# Supplementary material for: Half-Sandwich Rhodium Complexes with Releasable N-Donor Monodentate Ligands: Solution Chemical Properties and the Possibility for Acidosis Activation
Source: MDPI journal article supplement (doi:10.3390/pharmaceutics15020356), 2023-01-20
Supplement: s1 [file s1]

# SUPPLEMENTARY MATERIAL

## Half-Sandwich Rhodium Complexes with Releasable N-Donor Monodentate Ligands: Solution Chemical Properties and Possibility for Acidosis Activation

János P. Mészáros <sup>1,2,\*</sup>, Wolfgang Kandioller <sup>3,4</sup>, Gabriella Spengler <sup>1,5</sup>,  
Alexander Prado-Roller <sup>3,4</sup>, Bernhard K. Keppler <sup>3,4</sup> and Éva A. Enyedy <sup>1,2,\*</sup>

1 MTA-SZTE Lendület Functional Metal Complexes Research Group, University of Szeged, Dóm tér 7, H-6720 Szeged, Hungary

2 Department of Inorganic and Analytical Chemistry, Interdisciplinary Excellence Centre, University of Szeged, Dóm tér 7, H-6720 Szeged, Hungary

3 Institute of Inorganic Chemistry, Faculty of Chemistry, University of Vienna, Währinger Str. 42, A-1090 Vienna, Austria

4 Research Cluster “Translational Cancer Therapy Research”, University of Vienna, Währinger Str. 42, A-1090 Vienna, Austria

5 Department of Medical Microbiology, Albert Szent-Györgyi Health Center and Albert Szent-Györgyi Medical School, University of Szeged, Semmelweis utca 6, H-6725 Szeged, Hungary

\* Correspondence: meszaros.janos@chem.u-szeged.hu (J.P.M.); enyedy@chem.u-szeged.hu (É.A.E.)

### CONTENTS

|                                                                                                                |    |
|----------------------------------------------------------------------------------------------------------------|----|
| Figure S1.....                                                                                                 | 2  |
| Characterization of the isolated complexes: <sup>1</sup> H NMR and <sup>13</sup> C NMR spectroscopic data..... | 3  |
| data quality of structure determination, comparison of M–N bond lengths.....                                   | 16 |
| UV-vis spectra, fractions of mixed-ligand complexes as the function of pH, comparison of M–N bond lengths..... | 19 |
| Tables: Proton dissociation constants and formation constants .....                                            | 26 |
| Experimental data tables for single-crystal XRD .....                                                          | 27 |
| MIC values for all compounds, pH = 5–8 .....                                                                   | 30 |
| References.....                                                                                                | 31 |

**FIGURE S1.**

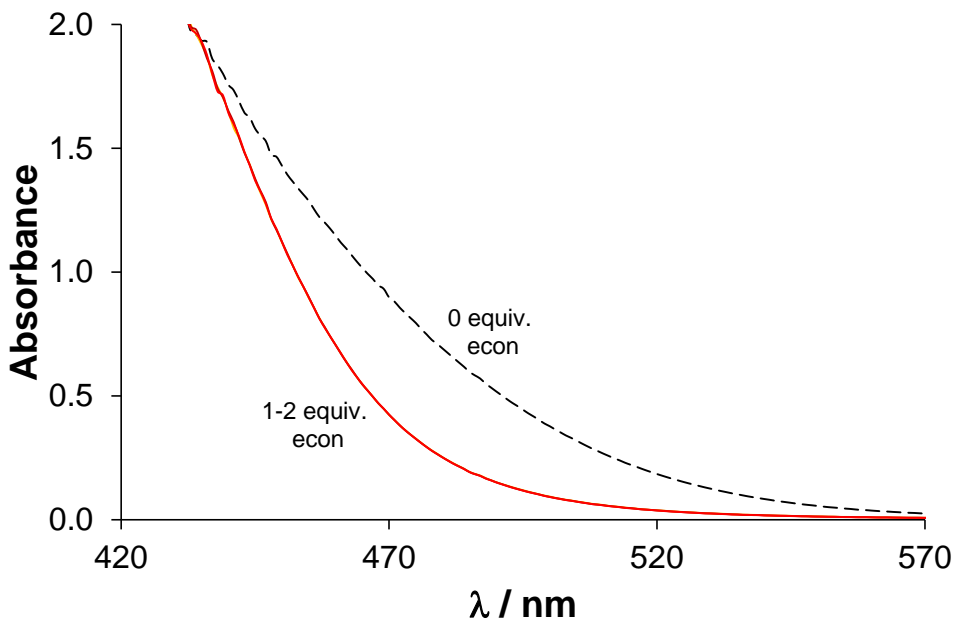

**Figure S1.** UV-vis spectra of the [RhCp\*(8HQH<sub>-1</sub>)(H<sub>2</sub>O)]<sup>+</sup> complex at different concentrations of econazole. Conditions are the same as in the stock solutions prepared for anticancer and antibacterial experiments (pH = 7.4 (phosphate buffer) with 50% (v/v) ethanol). { $c$ ([RhCp\*(8HQH<sub>-1</sub>)(H<sub>2</sub>O)]<sup>+</sup>) = 5 mM;  $c$ (econazole) = 0, 5 7.5 or 10 mM;  $t$  = 25 °C;  $\ell$  = 0.2 cm}

# CHARACTERIZATION OF THE ISOLATED COMPLEXES: $^1\text{H}$ NMR AND $^{13}\text{C}$ NMR SPECTROSCOPIC DATA

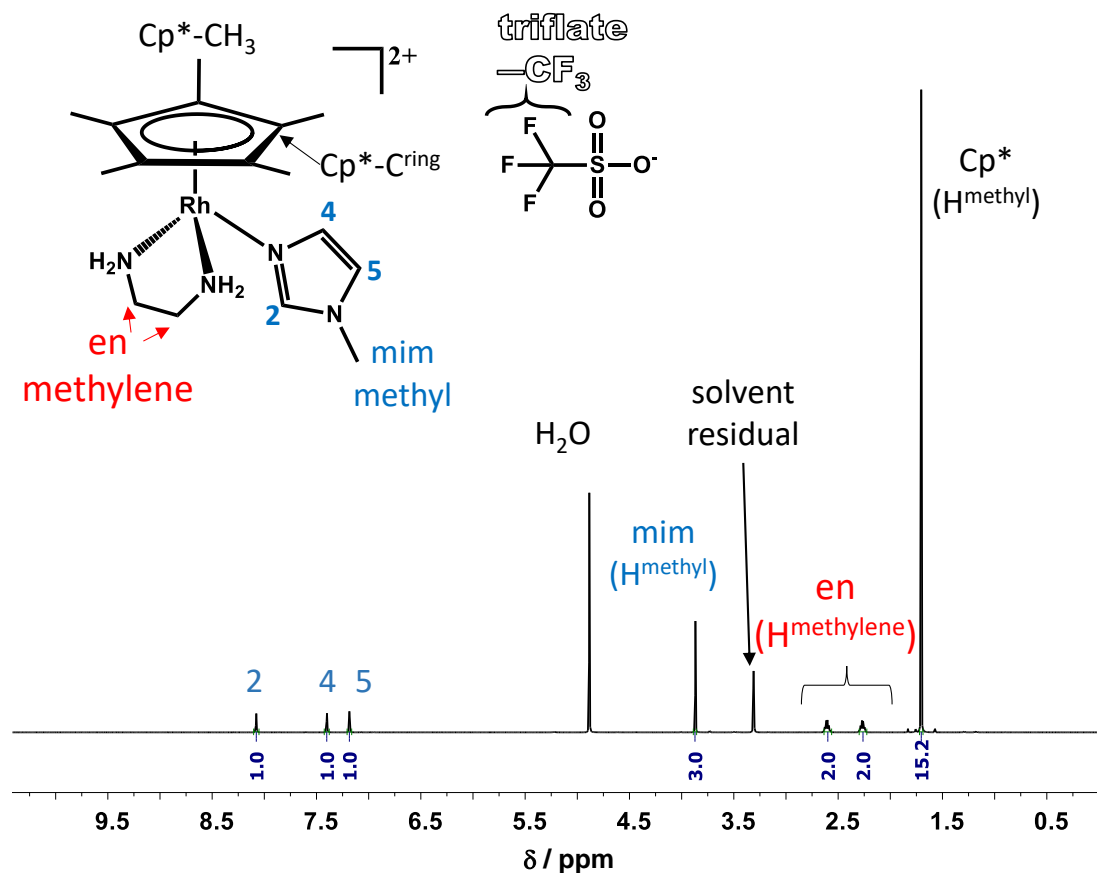

**Figure S2.**  $^1\text{H}$  NMR spectrum of  $[\text{RhCp}^*(\text{en})(\text{mim})](\text{CF}_3\text{SO}_3)_2$  in  $\text{CD}_3\text{OD}$ . Inserted structure shows numbering of peaks.  $\{c(\text{complex}) = 10 \text{ mM}, t = 25.0^\circ\text{C}\}$

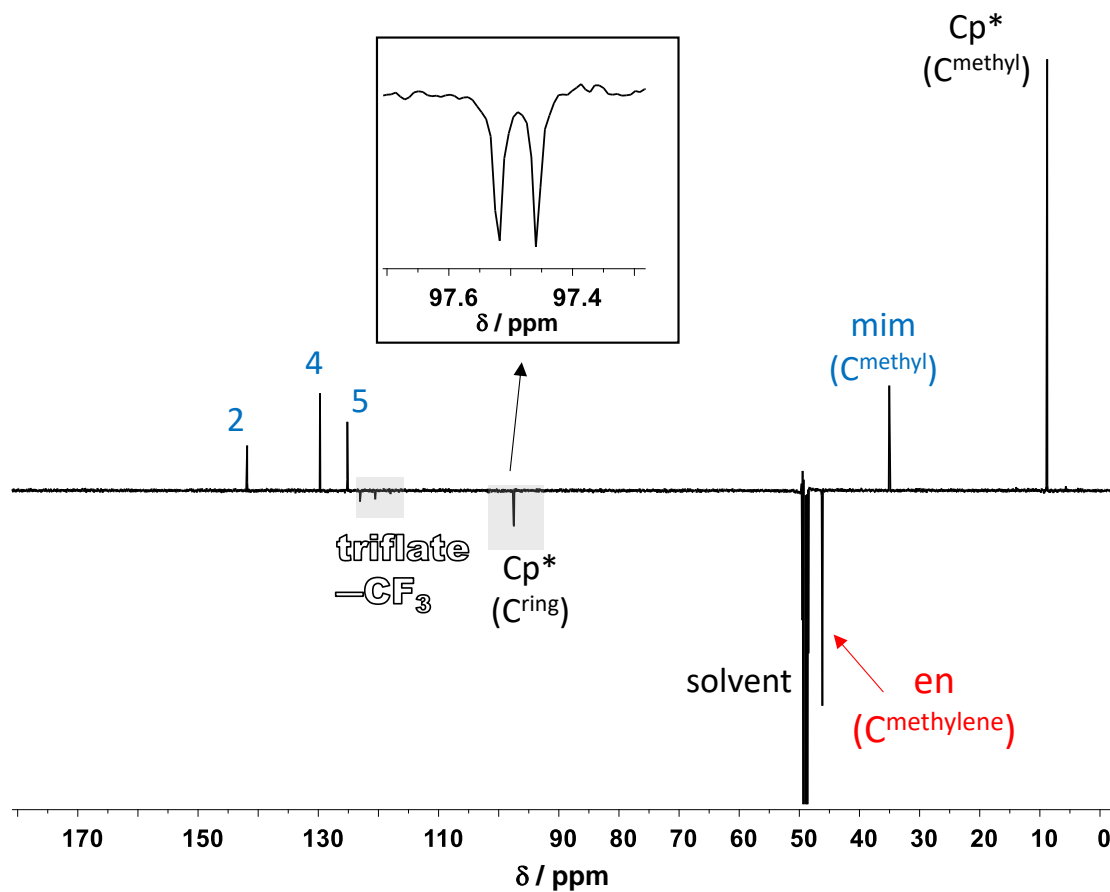

**Figure S3.**  $^{13}\text{C}$  APT NMR spectrum of  $[\text{RhCp}^*(\text{en})(\text{mim})](\text{CF}_3\text{SO}_3)_2$  in  $\text{CD}_3\text{OD}$ . For numbering see **Figure S2**. Inserted figure shows the doublet of  $\text{Cp}^*$  ring carbon atoms as a result of coupling with  $^{103}\text{Rh}$ .  $\{c(\text{complex}) = 10 \text{ mM}, t = 25.0^\circ\text{C}\}$

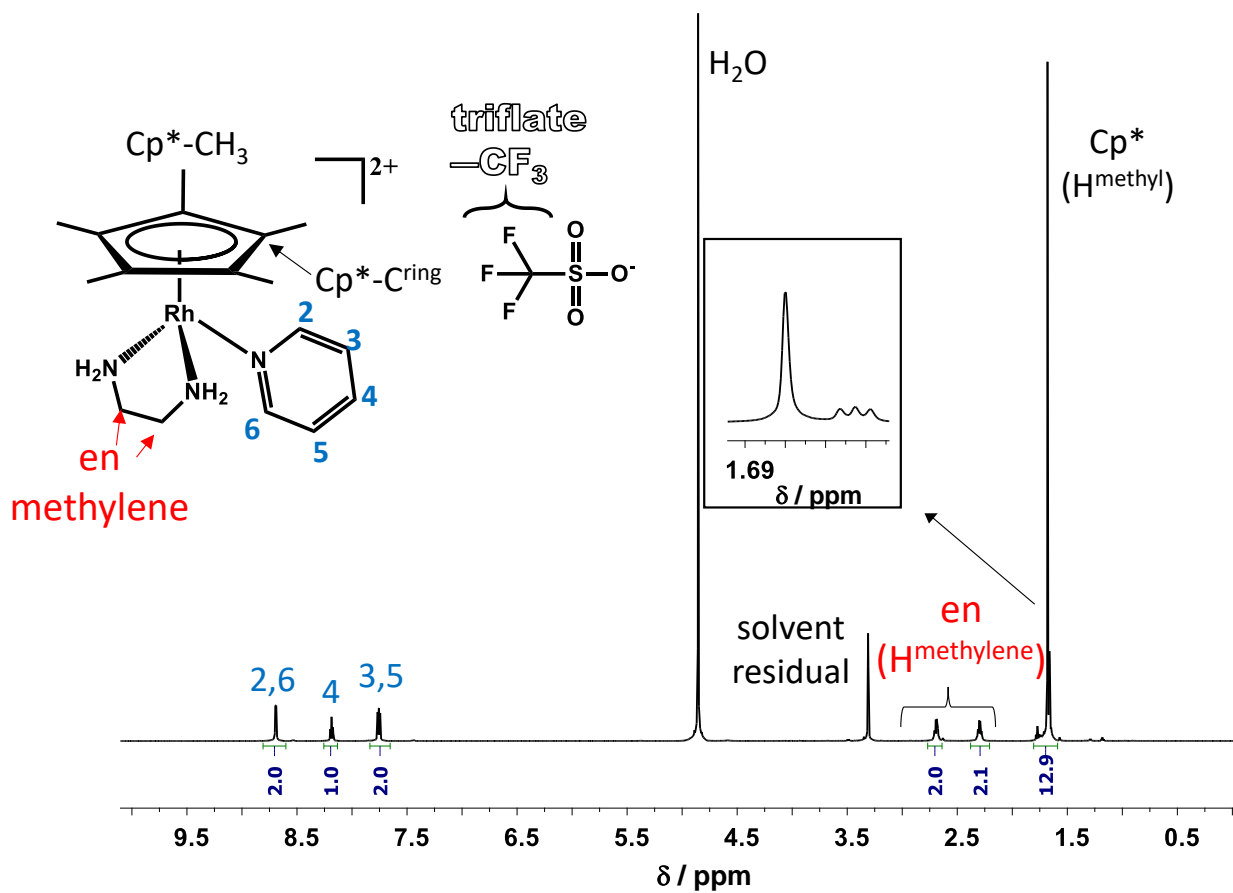

**Figure S4.** <sup>1</sup>H NMR spectrum of [RhCp\*(en)(Py)](CF<sub>3</sub>SO<sub>3</sub>)<sub>2</sub> in CD<sub>3</sub>OD. Inserted structure shows numbering of peaks. Inset shows a triplet indicating the presence of -CH<sub>2</sub>D group. {c(complex) = 10 mM, t = 25.0°C}

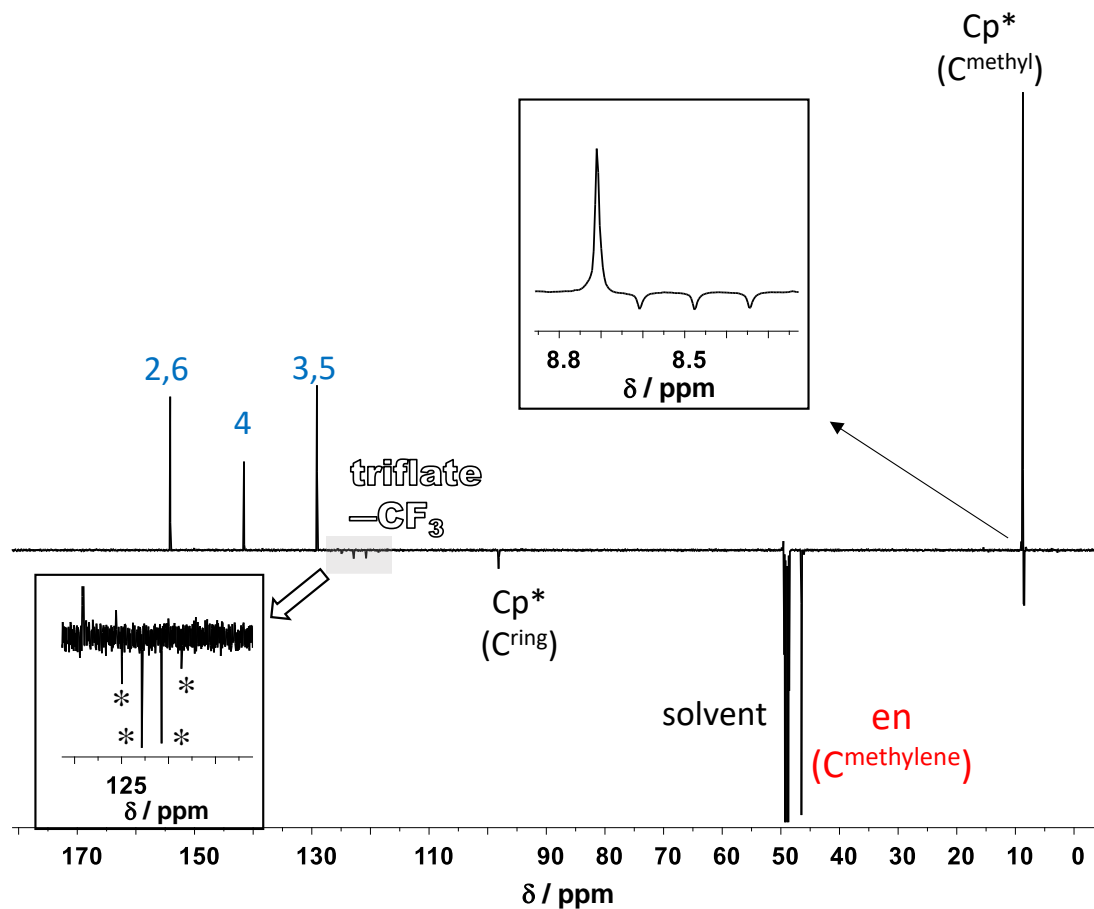

**Figure S5.**  $^{13}\text{C}$  APT NMR spectrum of  $[\text{RhCp}^*(\text{en})(\text{Py})](\text{CF}_3\text{SO}_3)_2$  in  $\text{CD}_3\text{OD}$ . For numbering see **Figure S4**. Inserted figure shows the quartet of  $-\text{CF}_3$  carbon atom as a result of coupling with  $^{19}\text{F}$  and a triplet indicating the presence of  $-\text{CH}_2\text{D}$  group.  $\{c(\text{complex}) = 10 \text{ mM}, t = 25.0^\circ\text{C}\}$

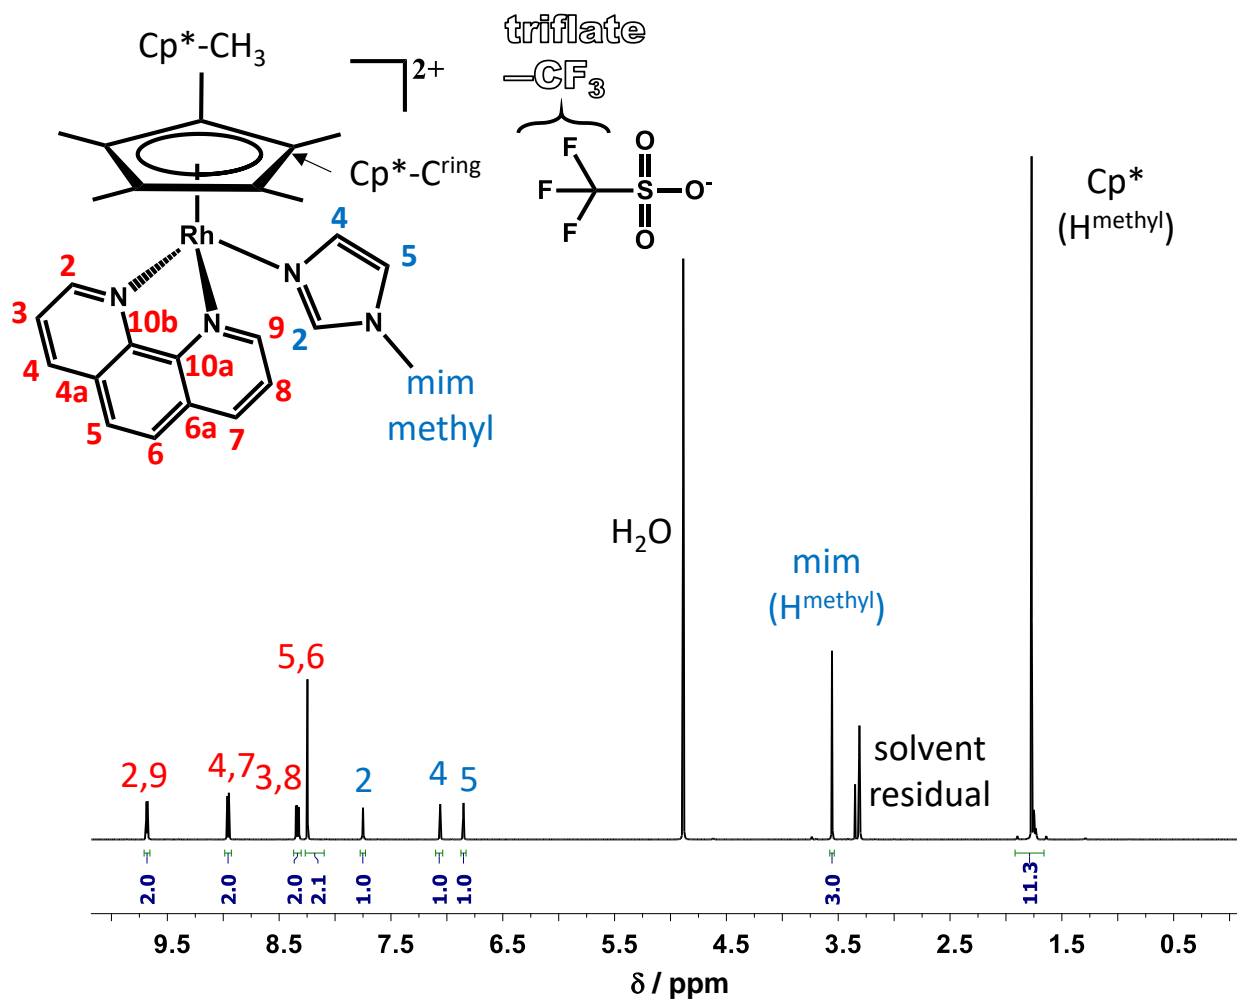

**Figure S6.**  $^1\text{H}$  NMR spectrum of  $[\text{RhCp}^*(\text{phen})(\text{mim})](\text{CF}_3\text{SO}_3)_2$  in  $\text{CD}_3\text{OD}$ . Inserted structure shows the numbering of peaks.  $\{c(\text{complex}) = 10 \text{ mM}, t = 25.0^\circ\text{C}\}$

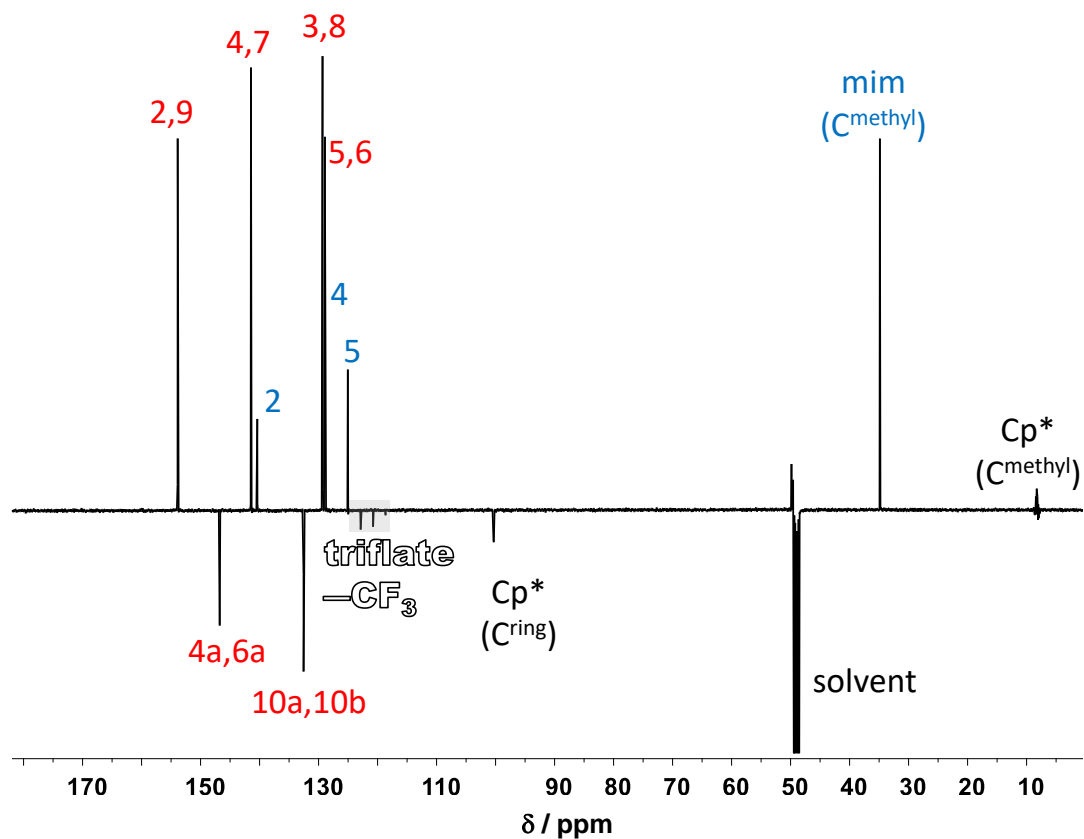

**Figure S7.**  $^{13}\text{C}$  APT NMR spectrum of  $[\text{RhCp}^*(\text{phen})(\text{mim})](\text{CF}_3\text{SO}_3)_2$  in  $\text{CD}_3\text{OD}$ . For numbering see **Figure S6**.  $\{c(\text{complex}) = 10 \text{ mM}, t = 25.0^\circ\text{C}\}$



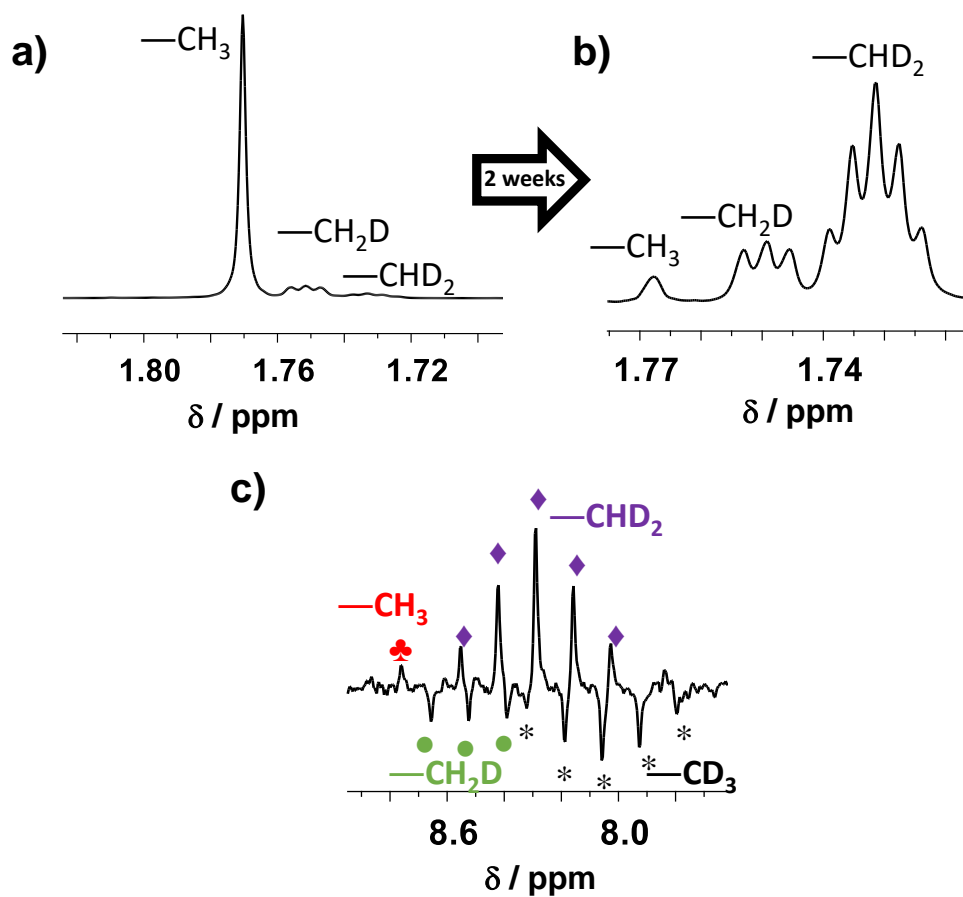

**Figure S8.** Upfield region of the  $^1\text{H}$  NMR spectrum of  $[\text{RhCp}^*(\text{phen})(\text{mim})](\text{CF}_3\text{SO}_3)_2$  in  $\text{CD}_3\text{OD}$ . a) Freshly prepared sample (waiting time < 1 day prior to measurement) and b) after ~2 weeks. c) Upfield region of the compound's  $^{13}\text{C}$  NMR spectrum shows the presence of the  $\text{Cp}^*$  methyl groups at different deuterated stages measured 2-week-old sample.  $\{c(\text{complex}) = 10 \text{ mM}, t = 25.0^\circ\text{C}\}$

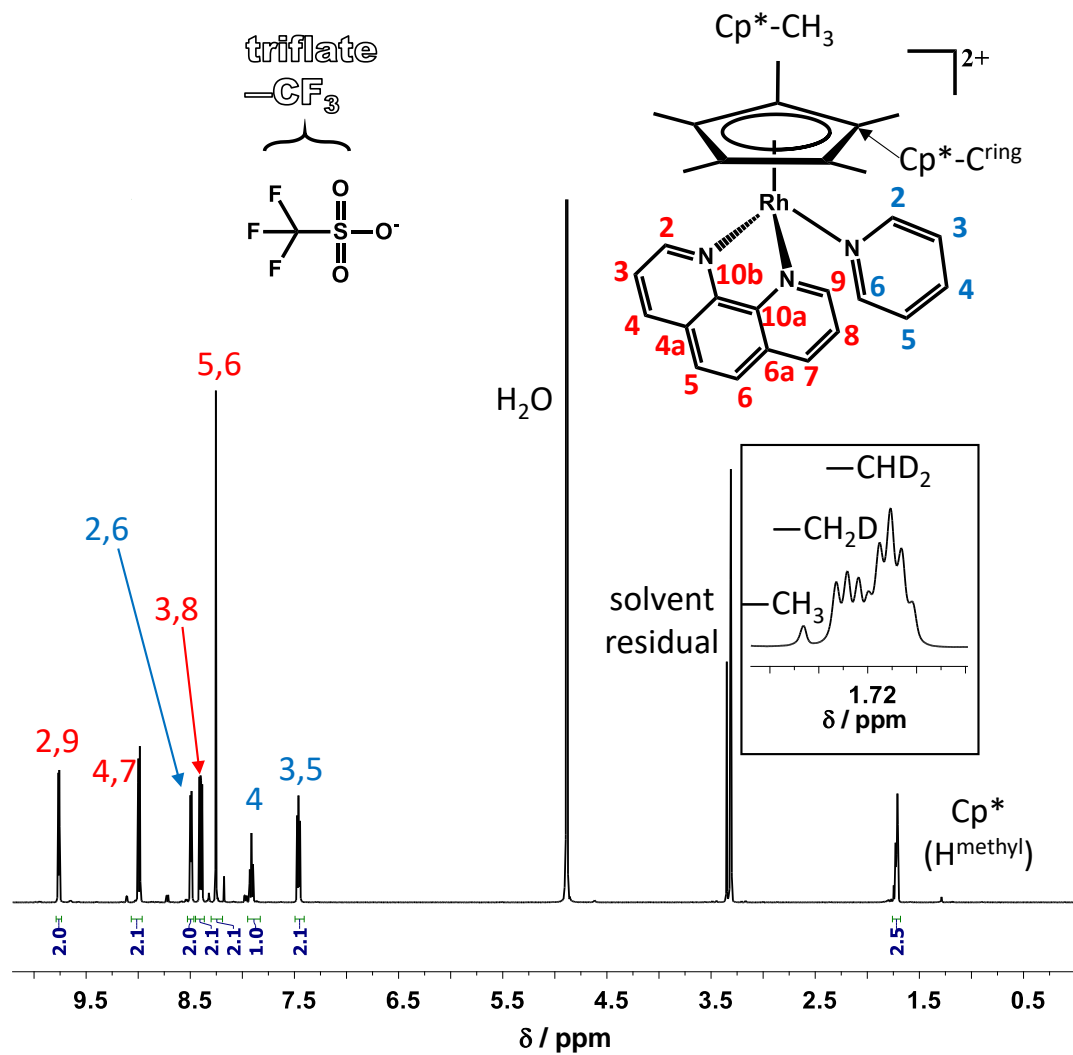

**Figure S9.**  $^1\text{H}$  NMR spectrum of  $[\text{RhCp}^*(\text{phen})(\text{Py})](\text{CF}_3\text{SO}_3)_2$  in  $\text{CD}_3\text{OD}$ . Inserted structure shows numbering of peaks. Inset shows the methyl groups of  $\text{Cp}^*$  at different deuteration stages.  $\{c(\text{complex}) = 10 \text{ mM}, t = 25.0^\circ\text{C}\}$

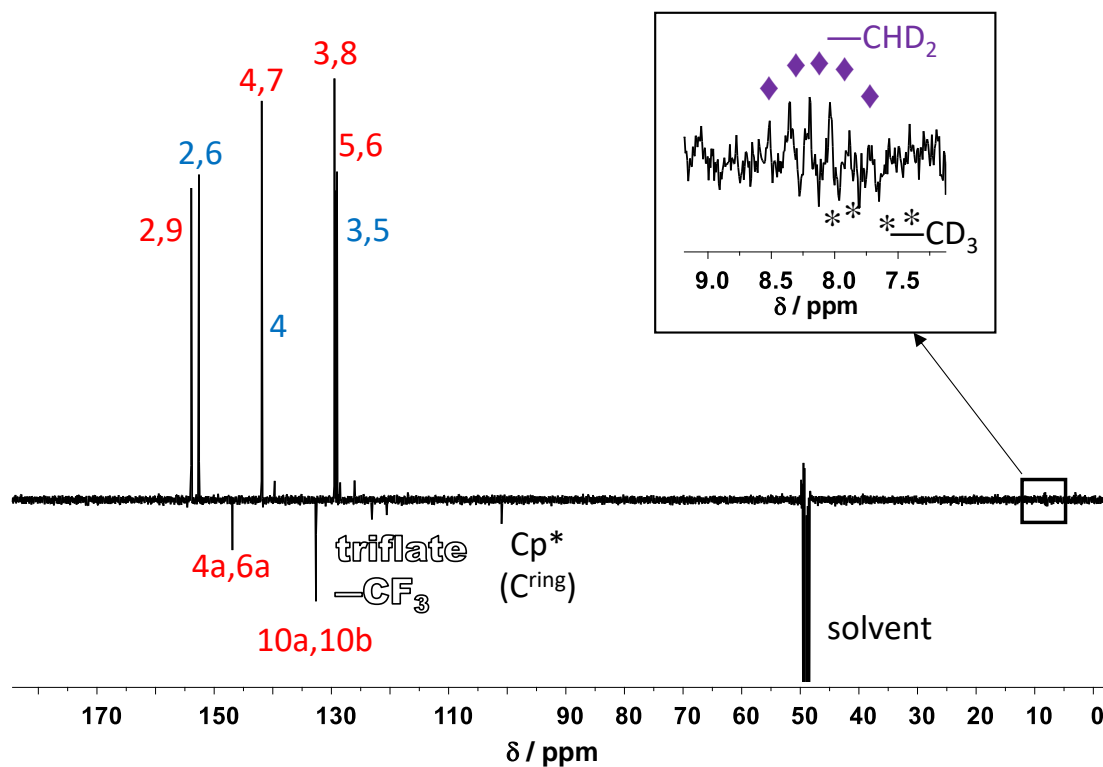

**Figure S10.**  $^{13}\text{C}$  APT NMR spectrum of  $[\text{RhCp}^*(\text{phen})(\text{Py})](\text{CF}_3\text{SO}_3)_2$  in  $\text{CD}_3\text{OD}$ . For numbering see **Figure S9**. Inset shows the presence of the  $\text{Cp}^*$  methyl groups at different deuterated stages.  $\{c(\text{complex}) = 10 \text{ mM}, t = 25.0^\circ\text{C}\}$

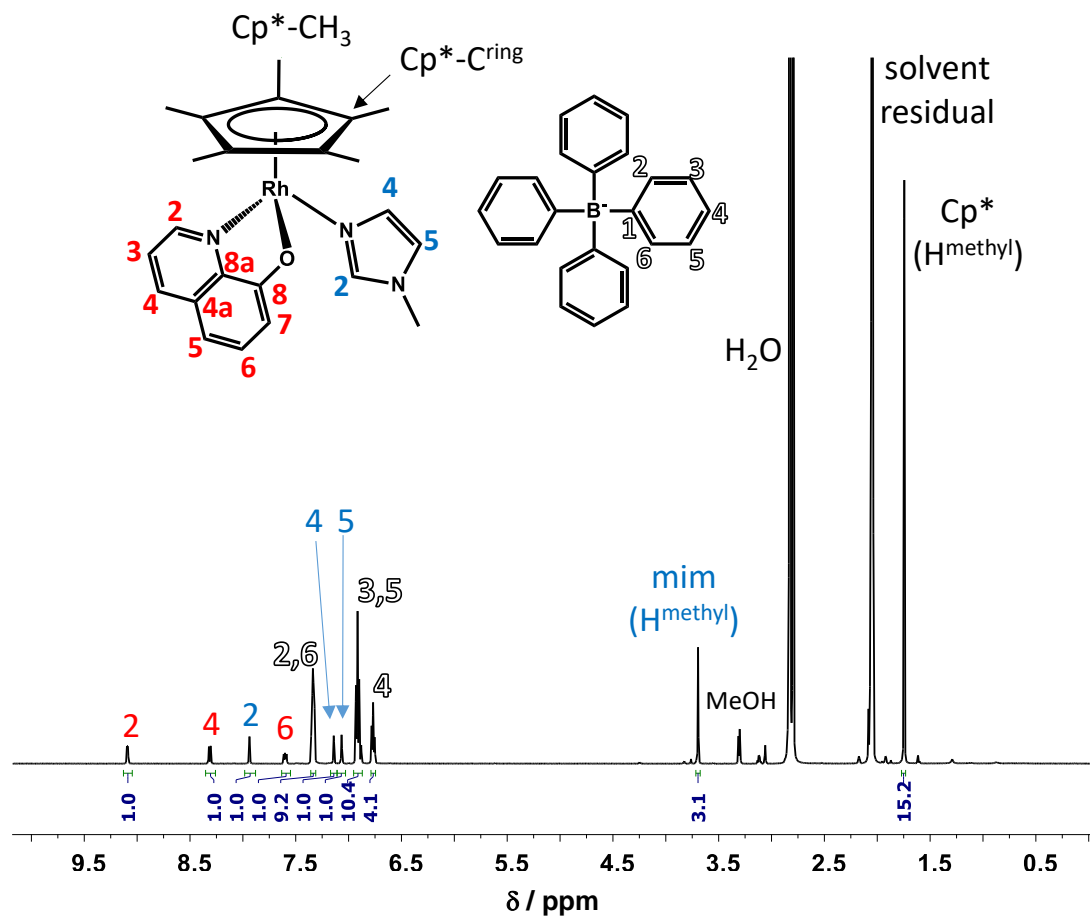

**Figure S11.**  $^1\text{H}$  NMR spectrum of  $[\text{RhCp}^*(8\text{HQH-1})(\text{mim})](\text{BPh}_4)$  in acetone- $\text{d}_6$ . Inserted structure shows numbering of peaks.  $\{c(\text{complex}) = 2 \text{ mM}, t = 25.0^\circ\text{C}\}$

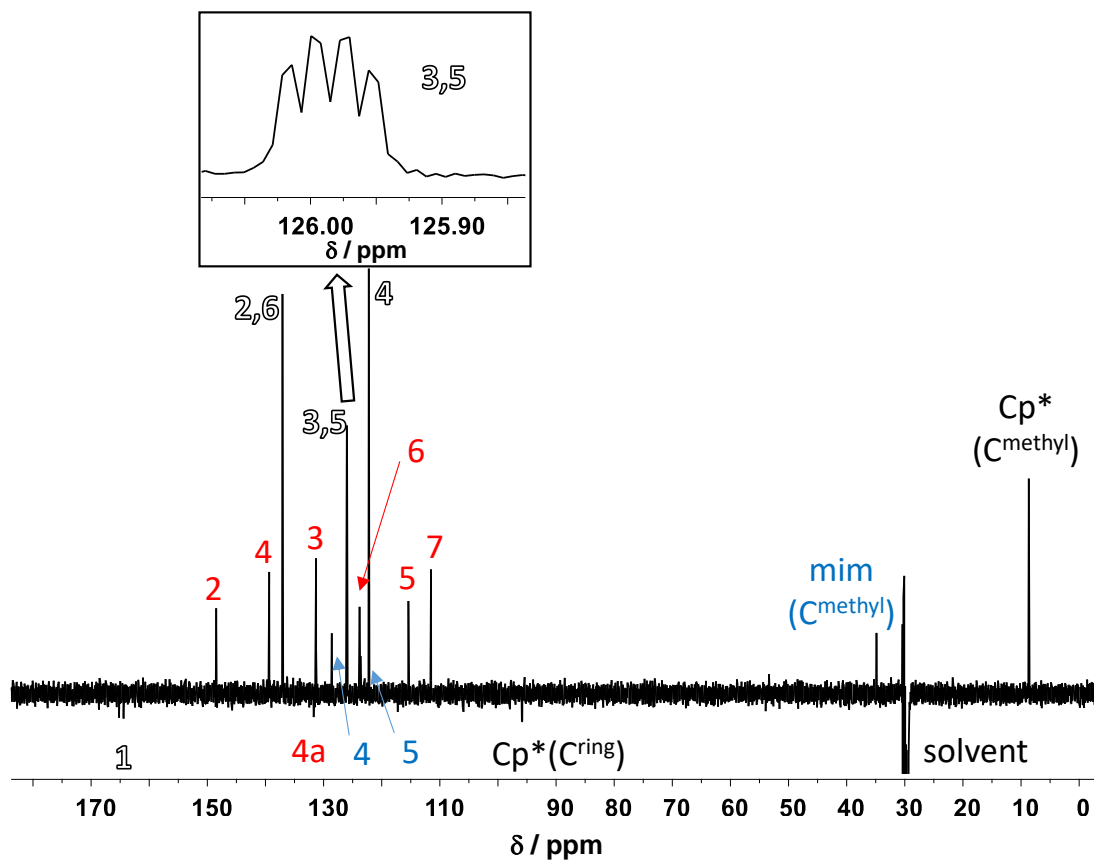

**Figure S12.**  $^{13}\text{C}$  APT NMR spectrum of  $[\text{RhCp}^*(8\text{HQH}_{-1})(\text{mim})](\text{BPh}_4)$  in  $\text{acetone-d}_6$ . For numbering see **Figure S11**. Inset shows the coupling with  $^{11}\text{B}$  in  $\text{BPh}_4$ .  $\{c(\text{complex}) = 2 \text{ mM}, t = 25.0^\circ\text{C}\}$

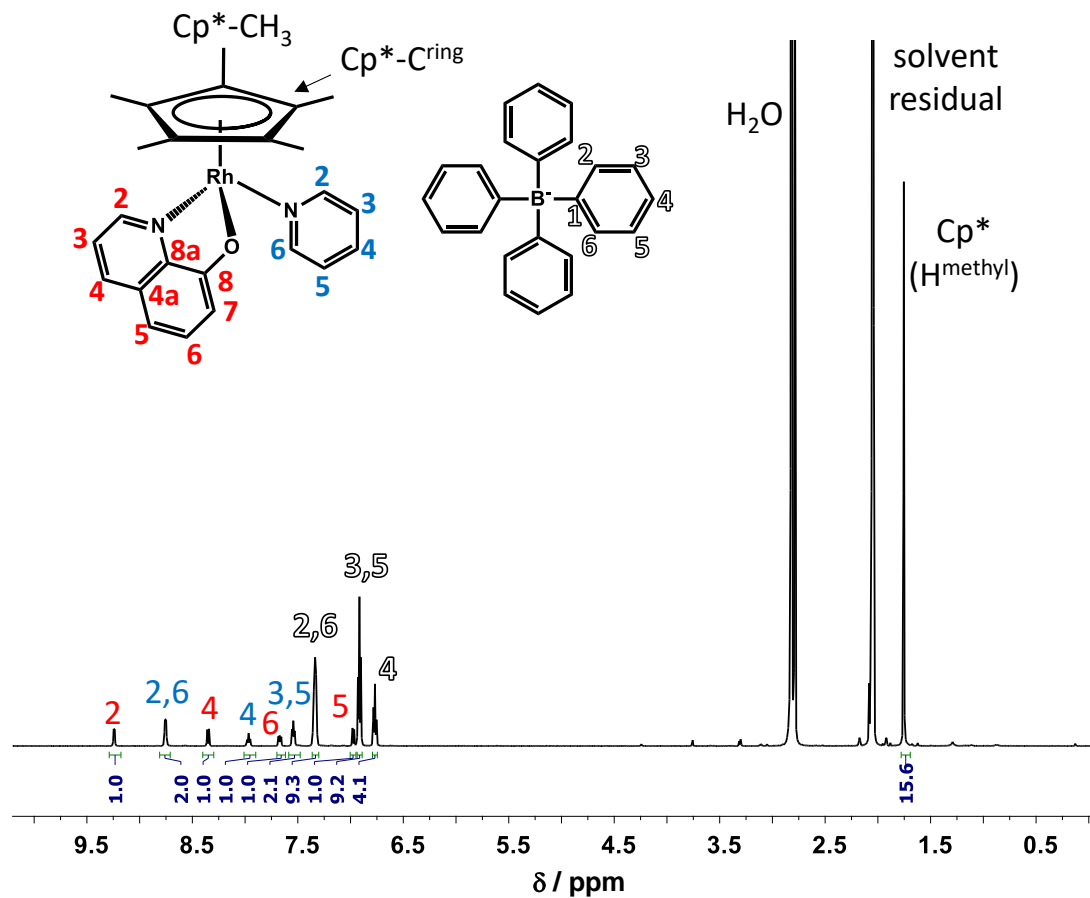

**Figure S13.**  $^1\text{H}$  NMR spectrum of  $[\text{RhCp}^*(8\text{HQBH}^-)(\text{Py})](\text{BPh}_4)$  in  $\text{acetone-d}_6$ . Inserted structure shows numbering of peaks.  $\{c(\text{complex}) = 2 \text{ mM}, t = 25.0^\circ\text{C}\}$

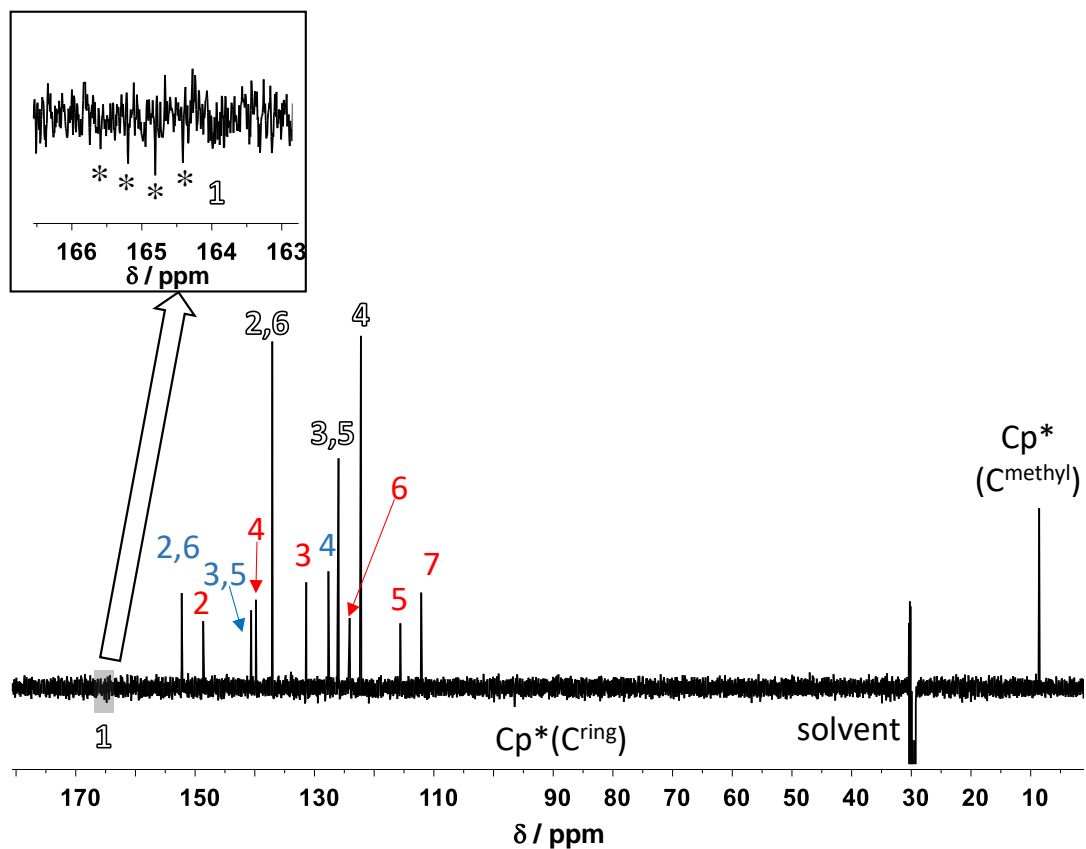

**Figure S14.**  $^{13}\text{C}$  APT NMR spectrum of  $[\text{RhCp}^*(8\text{HQH-1})(\text{Py})](\text{BPh}_4)$  in  $\text{acetone-d}_6$ . For numbering see **Figure S13**. Inset shows the coupling with  $^{11}\text{B}$  in  $\text{BPh}_4^-$ .  $\{c(\text{complex}) = 2 \text{ mM}, t = 25.0^\circ\text{C}\}$

## DATA QUALITY OF STRUCTURE DETERMINATION, COMPARISON OF M–N BOND LENGTHS

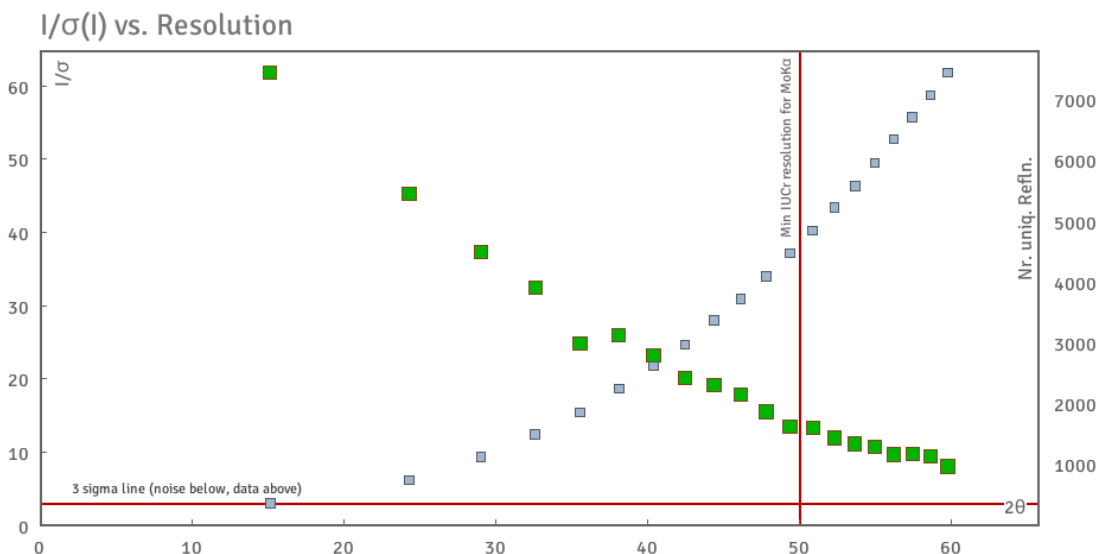

**Figure S15.** Data quality for complex 1': all data are above the three sigma line (along the minimum defined by the International Union of Crystallography (IUCR)).

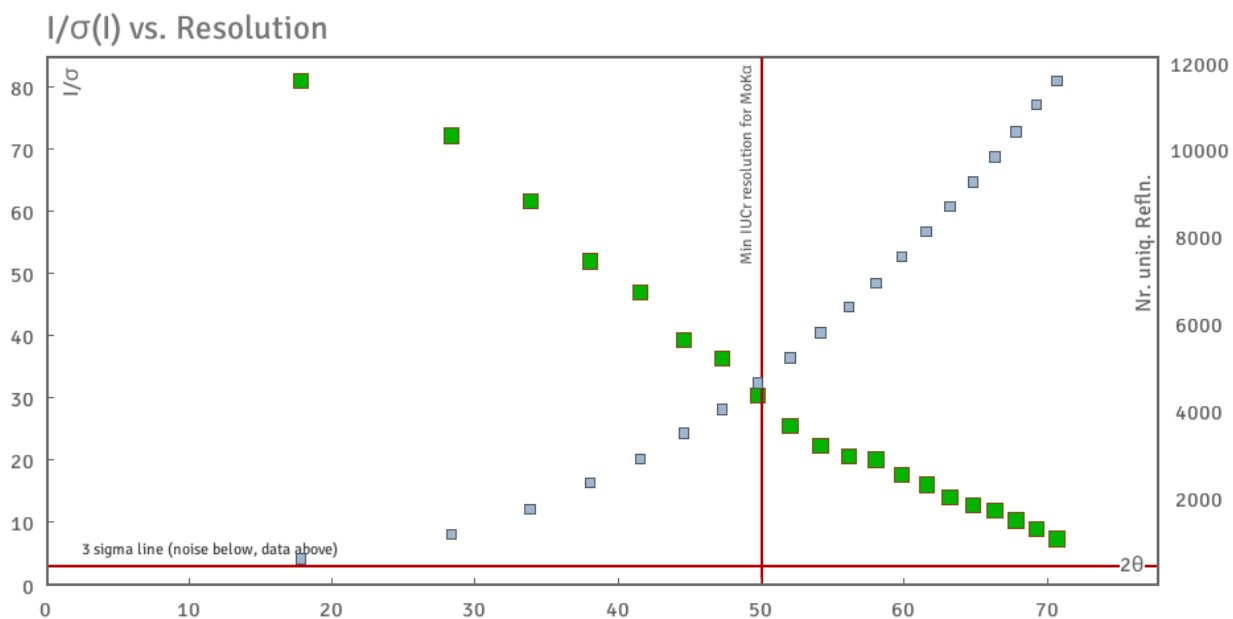

**Figure S16.** Data quality for complex 2': all data are above the three sigma line (along the minimum defined by IUCR).



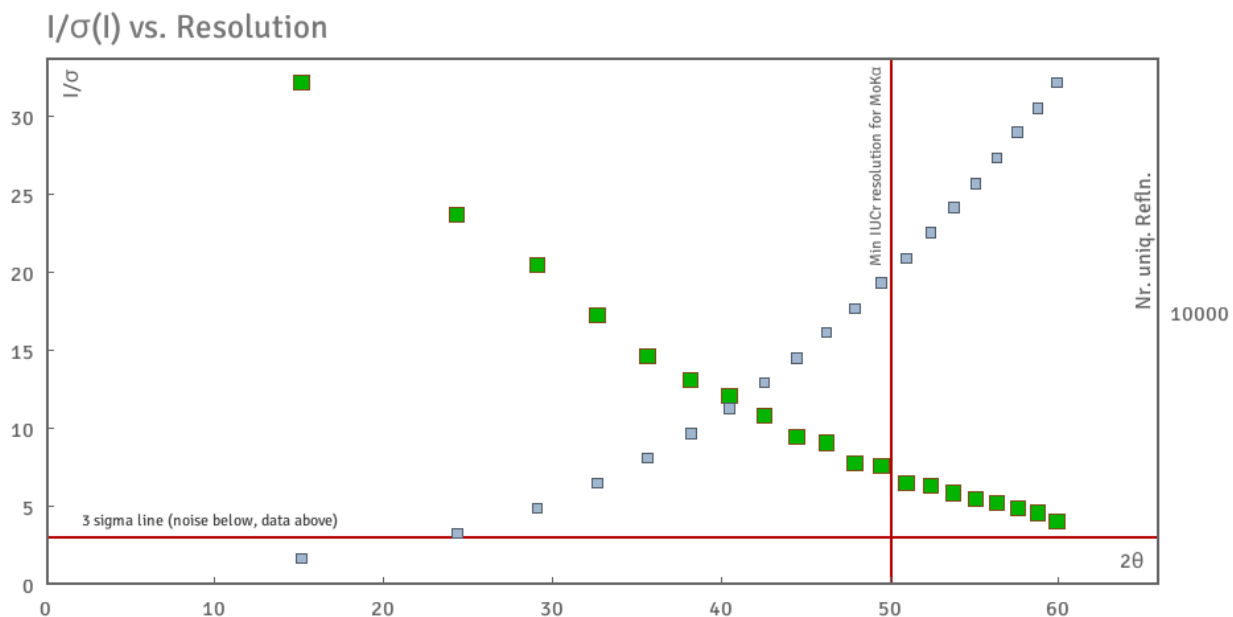

**Figure S17.** Data quality for complex 3': all data are above the three sigma line (along the minimum defined by IUCR).

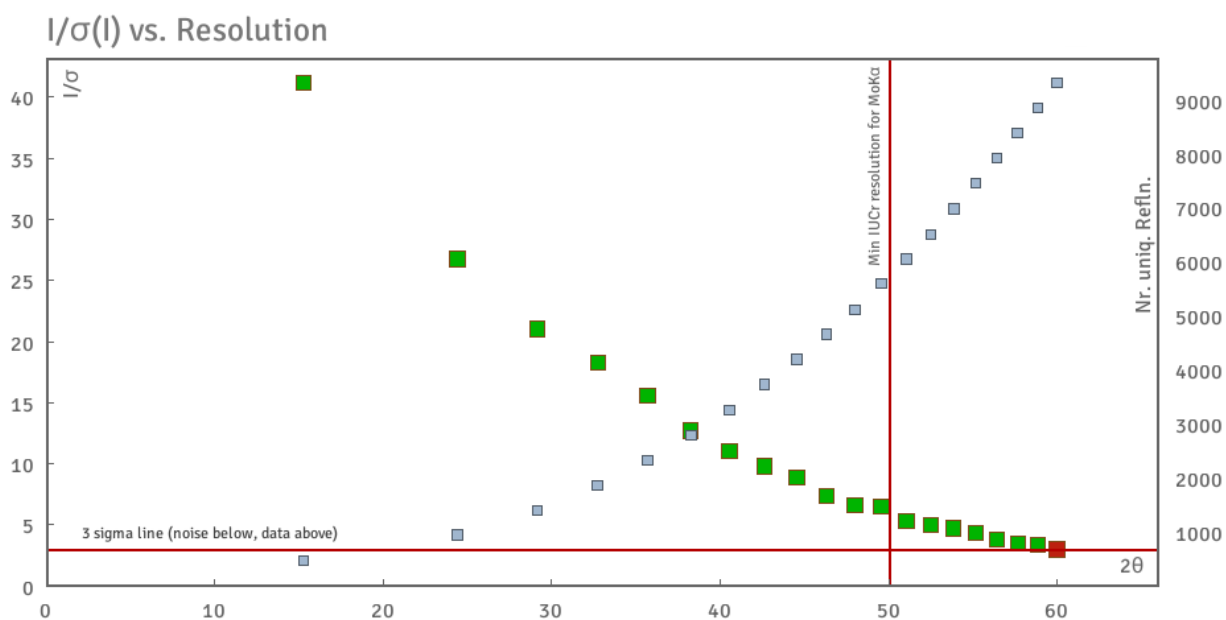

**Figure S18.** Data quality for complex 4': all data are above the three sigma line (along the minimum defined by IUCR).

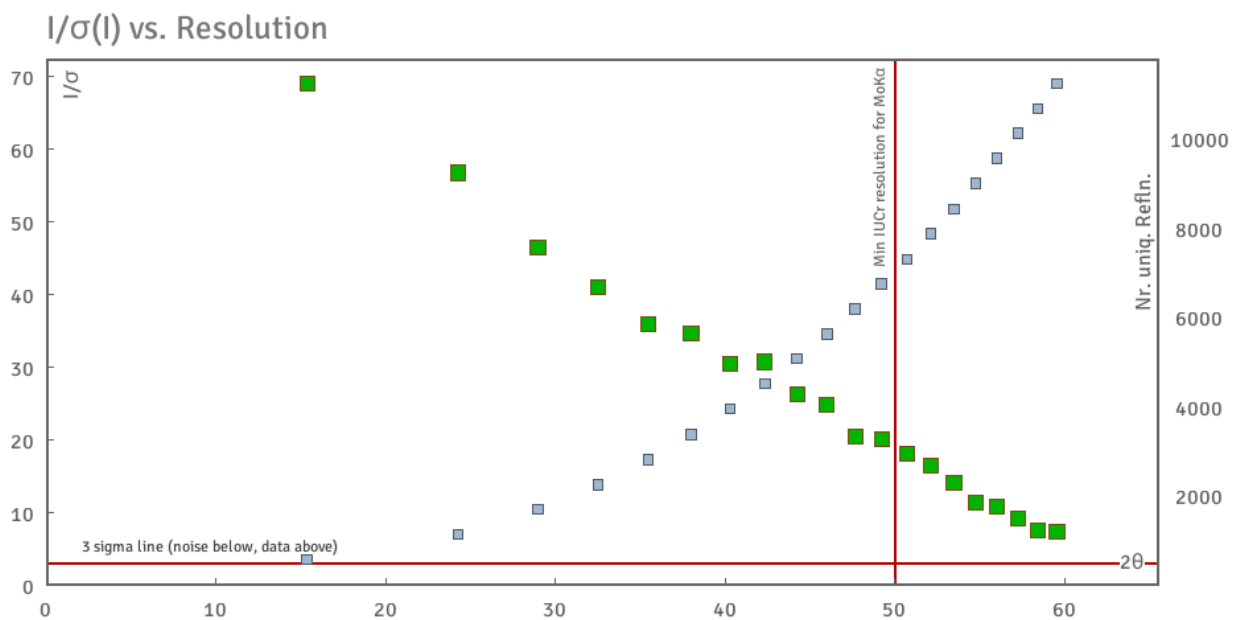

**Figure S19.** Data quality for complex **5'**: all data are above the three sigma line (along the minimum defined by IUCR).

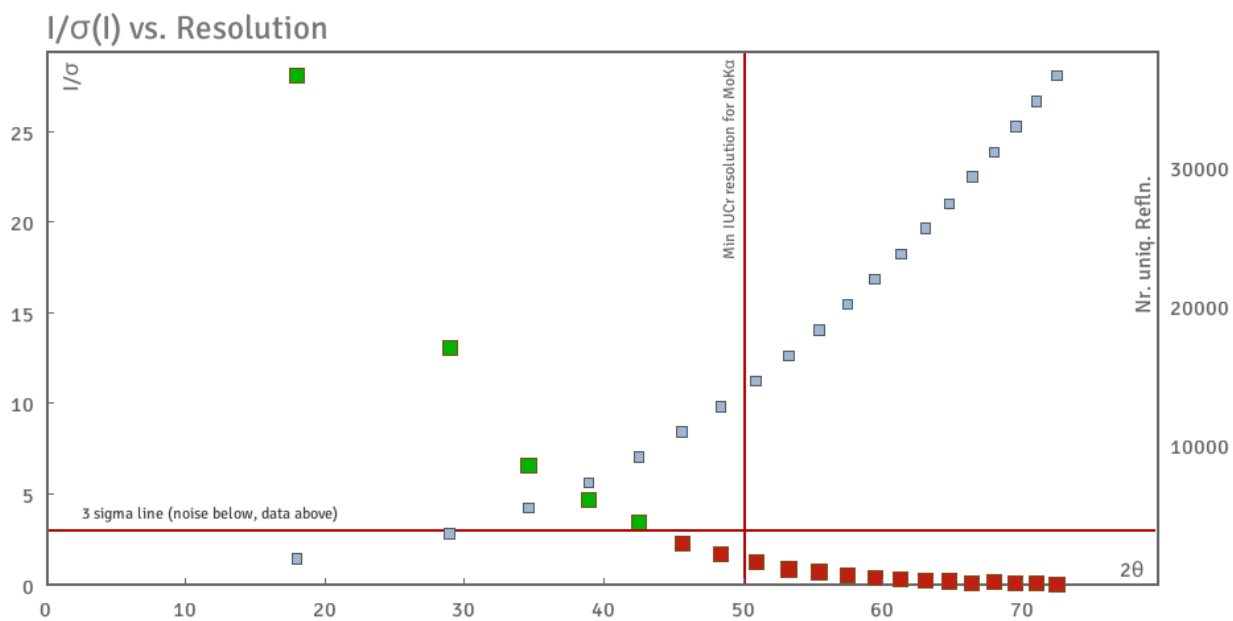

**Figure S20.** Data quality for complex **6'**: almost all data are above the three sigma line (along the minimum defined by IUCR). Data close to 50 degree (0.82, Mo) are still used in the refinement.

# UV-Vis SPECTRA, FRACTIONS OF MIXED-LIGAND COMPLEXES AS THE FUNCTION OF pH, COMPARISON OF M–N BOND LENGTHS

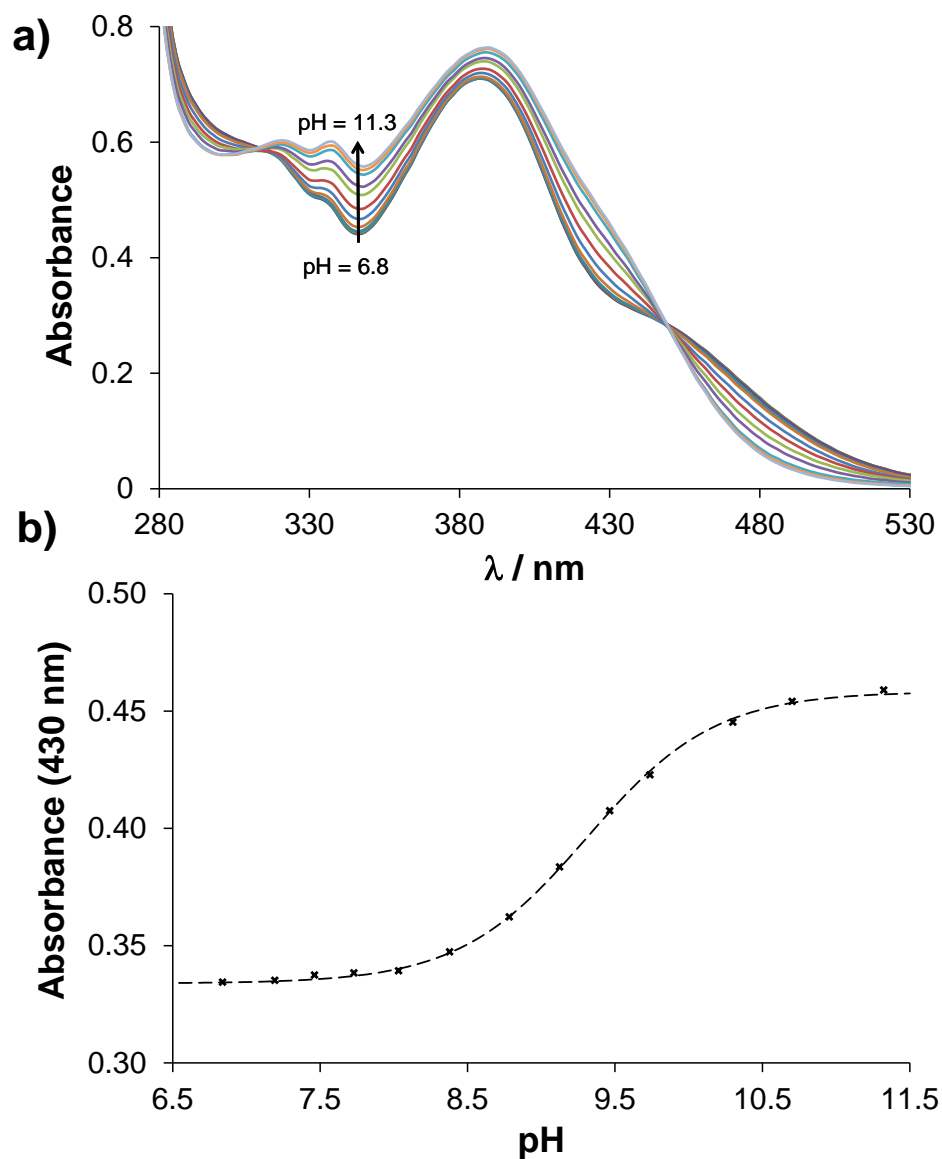

**Figure S21.** a) pH-dependent UV-vis spectra of  $[\text{Ru}(\eta^6\text{-}p\text{-cym})(8\text{HQB-1})(\text{H}_2\text{O})]^+$  in the pH-range 2.0–11.5. b) Absorbance values at 430 nm in the function of pH.  $\{c([\text{Ru}(\eta^6\text{-}p\text{-cym})(8\text{HQB-1})(\text{H}_2\text{O})]^+) = 200 \mu\text{M}; I = 0.10 \text{ M (KCl)}, t = 25 \text{ }^\circ\text{C}, \ell = 1 \text{ cm}\}$

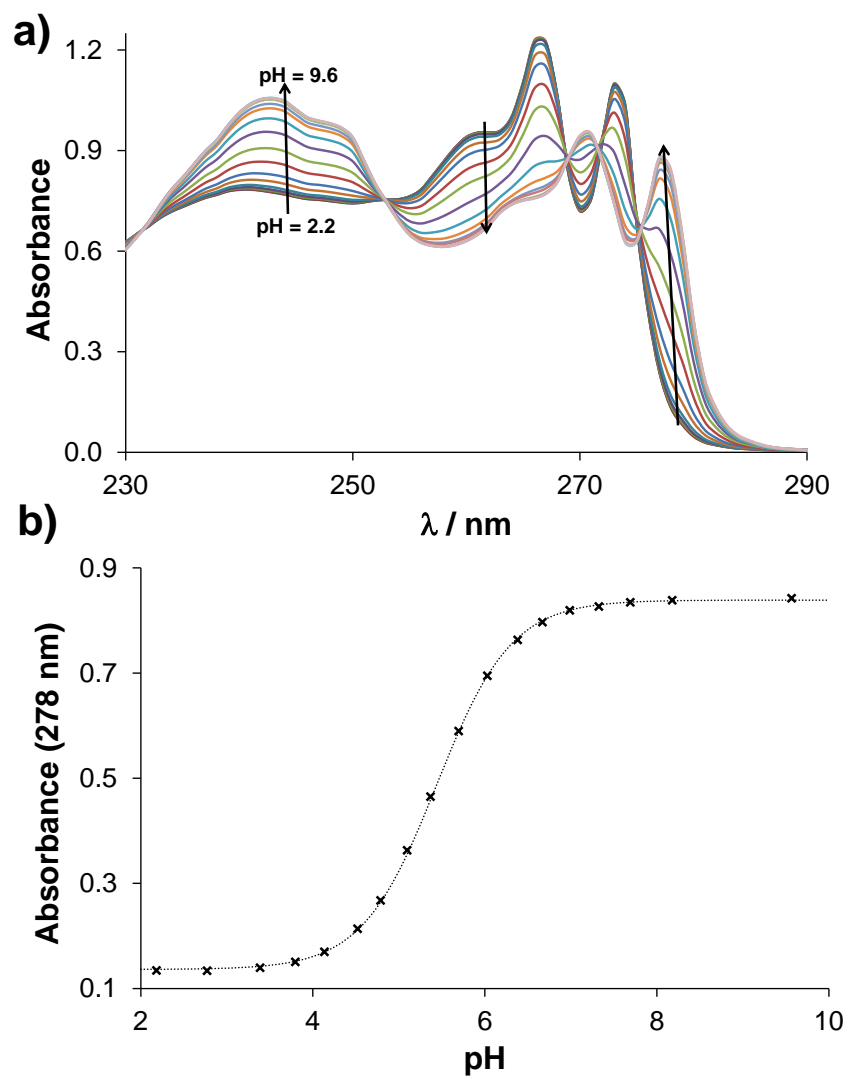

**Figure S22.** a) pH-dependent UV-vis spectra of benzimidazole in the pH-range 2.0–10.5. b) Absorbance values at 278 nm in the function of pH together with the fitted line (dotted line).  $\{c(\text{bim}) = 200 \text{ } \mu\text{M}; I = 0.10 \text{ M (KCl)}, t = 25 \text{ } ^\circ\text{C}, \ell = 0.2 \text{ cm}\}$ .

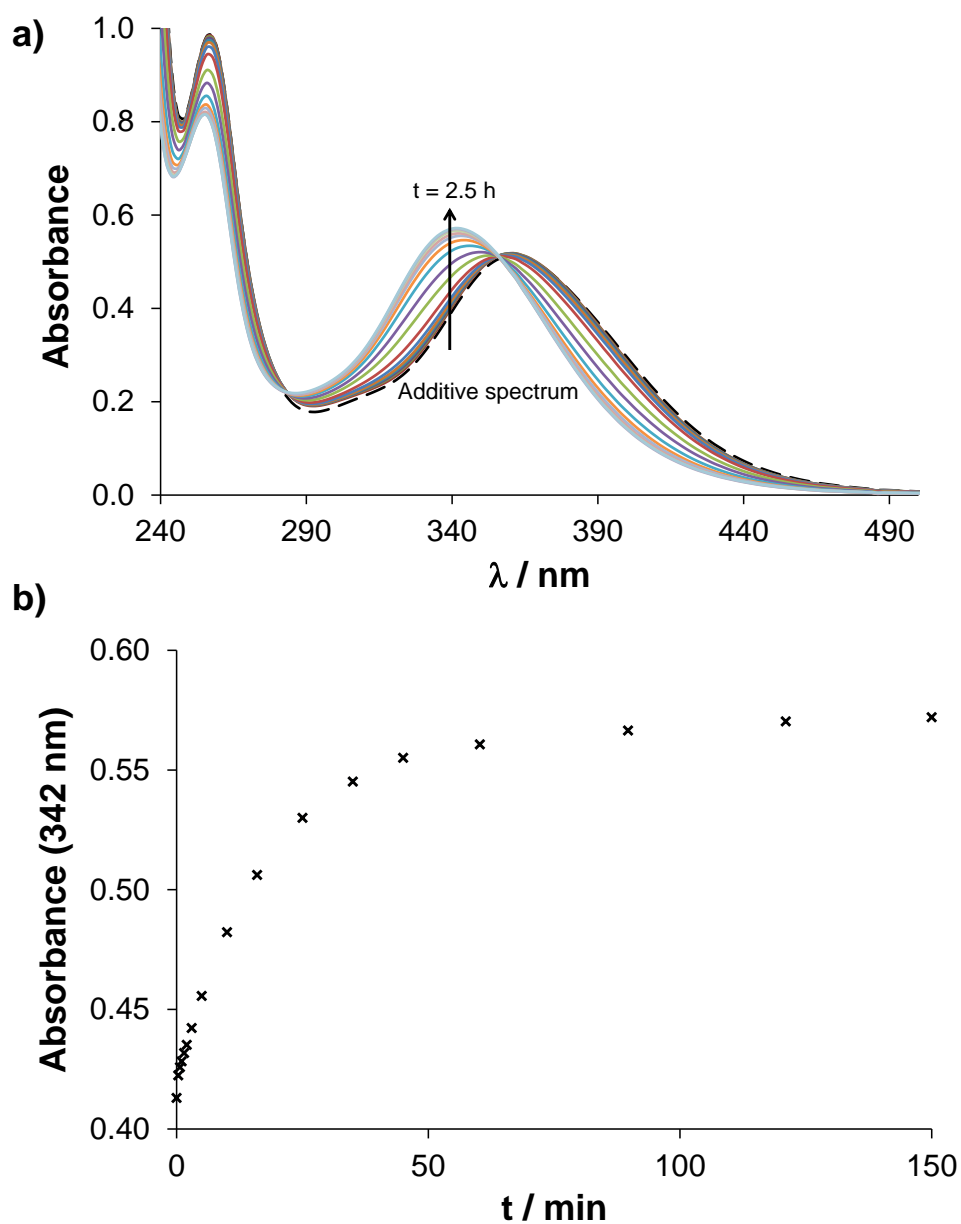

**Figure S23.** a) Time-dependent UV-vis spectra of the sample containing a mixture with  $c([\text{RhCp}^*(\text{en})(\text{H}_2\text{O})]^{2+}):c(1\text{-methylimidazole}) = 1:2$  composition at pH = 5.94. b) Time dependence of absorbance values at 342 nm.  $\{c([\text{RhCp}^*(\text{en})(\text{H}_2\text{O})]^{2+}) = 200 \text{ } \mu\text{M}; c(1\text{-methylimidazole}) = 400 \text{ } \mu\text{M}; \text{pH} = 5.94 \text{ (PBS')}; t = 25 \text{ } ^\circ\text{C}; \ell = 1 \text{ cm}\}$

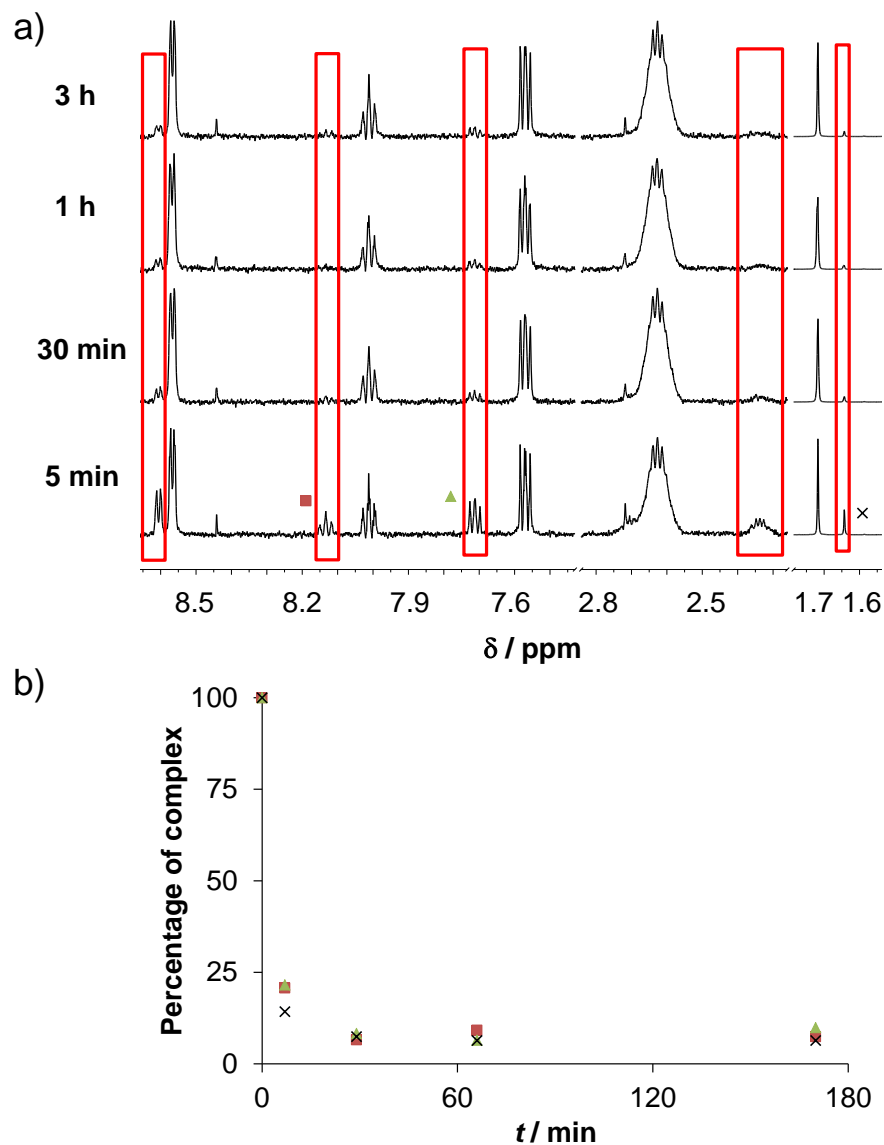

**Figure S24.** a) Time-dependent  $^1\text{H}$  NMR spectra of the  $[\text{RhCp}^*(\text{en})(\text{Py})](\text{CF}_3\text{SO}_3)_2$  synthesized complex at pH = 6.0. Red rectangles are highlighting peaks of the remaining mixed-ligand complex. b) Time-dependence of the presence of mixed-ligand complex (in percentage) based on integrals of the peaks of pyridine and  $\text{Cp}^*$ . Assignment:  $\times$  =  $\text{Cp}^*$ ;  $\blacksquare$  = pyr- $\text{H}^{3,5}$ ;  $\blacktriangle$  = pyr- $\text{H}^4$ .  $\{c([\text{RhCp}^*(\text{en})(\text{Py})](\text{CF}_3\text{SO}_3)_2) = 200 \mu\text{M}$ ; pH = 6.0 (PBS'); 10%  $\text{D}_2\text{O}$ ;  $t = 25^\circ\text{C}$ ; }

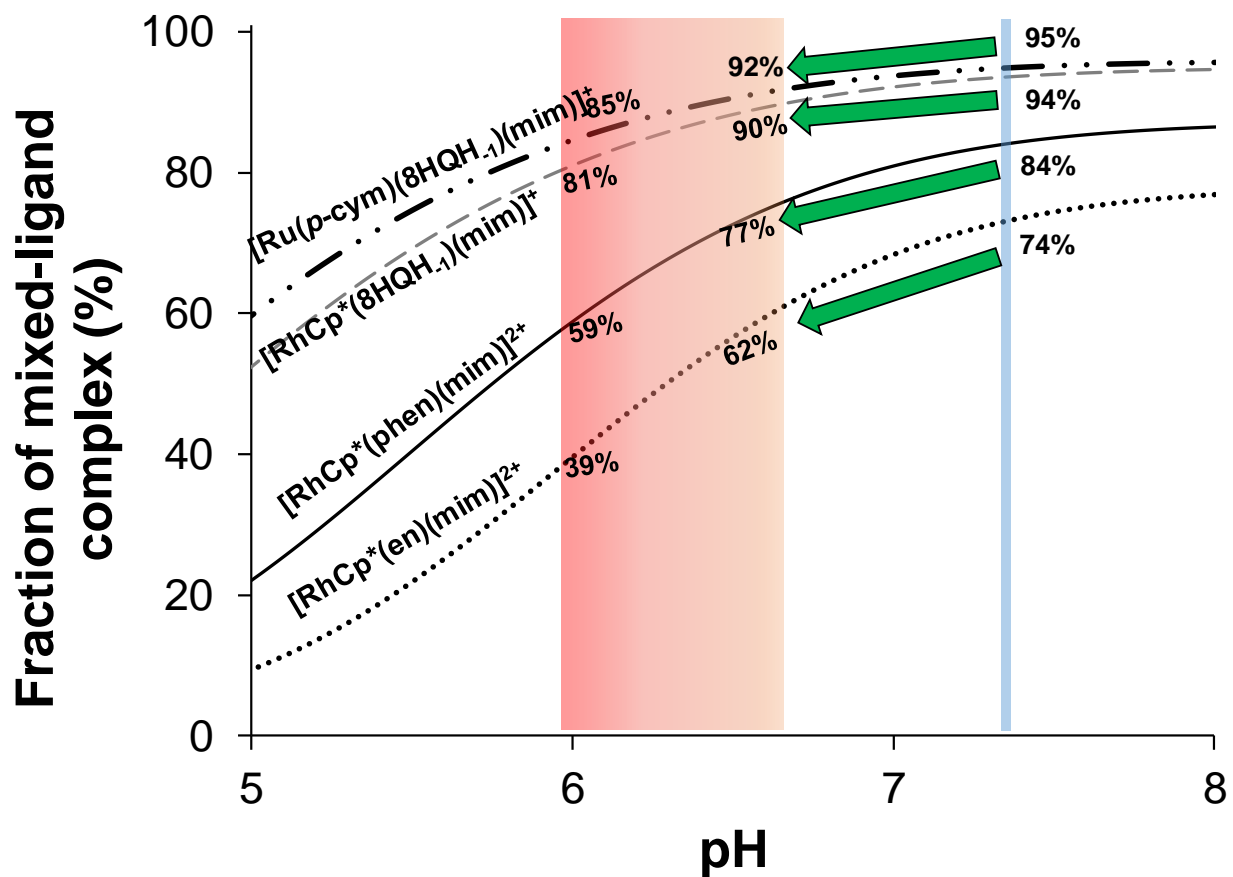

**Figure S25.** Fractions of the formed mixed-ligand complexes of 1-methylimidazole in the pH-range 5.0–8.0. Calculations based on the stability constants of the mixed-ligand complexes (Table S2) and proton dissociation constants in Table 1.  $\{c([\text{M}(\text{arene})(\text{N},\text{N}/\text{O})(\text{H}_2\text{O})) = c(\text{mim}) = 100 \mu\text{M}; I = 0.10 \text{ M (KCl)}, t = 25 \text{ }^\circ\text{C}\}$ .

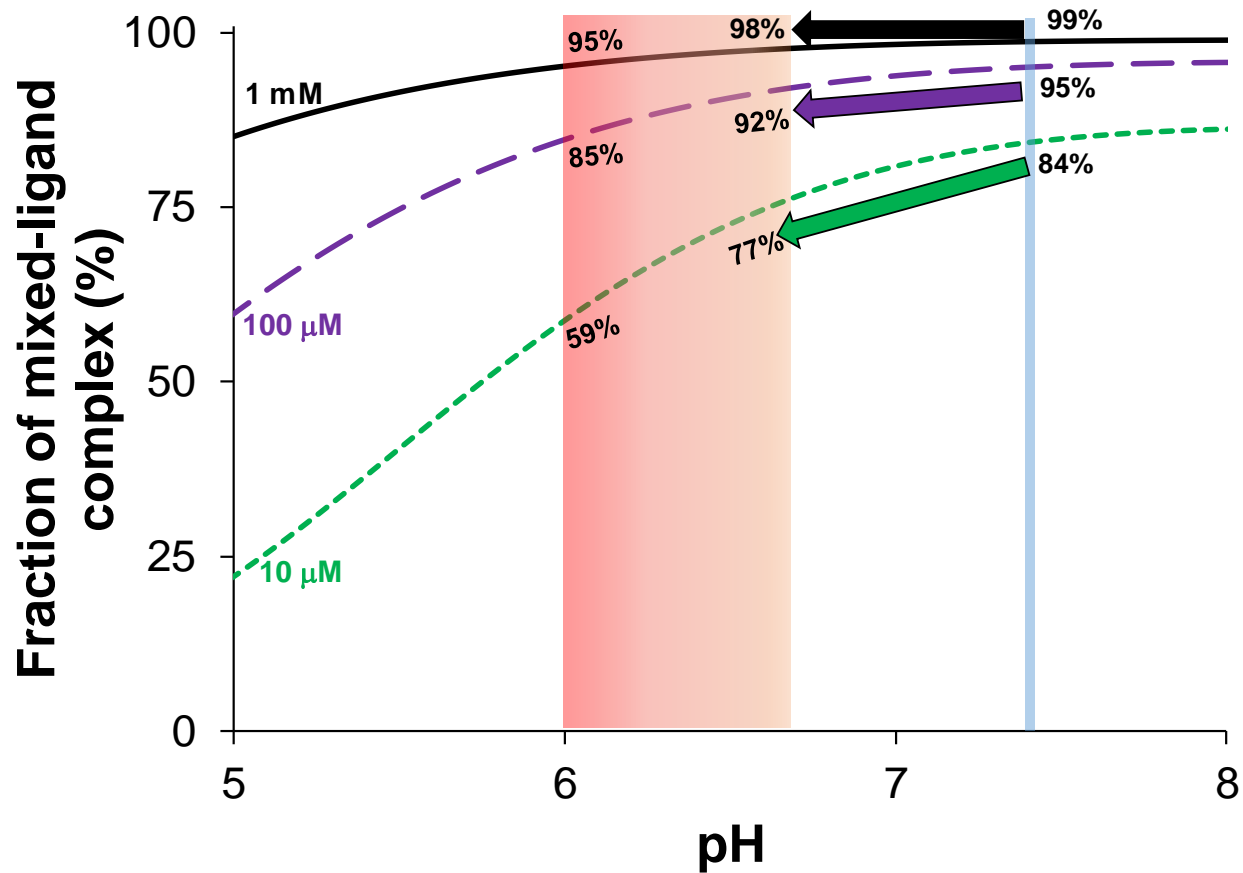

**Figure S26.** Formation (%) of  $[\text{Ru}(\eta^6\text{-}p\text{-cym})(8\text{HQH-1})(\text{mim})]^+$  in the pH-range 5.0–8.0 at various equimolar concentrations of monodentate ligand and aqua complex.  $\{c([\text{Ru}(\eta^6\text{-}p\text{-cym})(8\text{HQH-1})(\text{H}_2\text{O})])^+ = c(\text{mim}) = 10\text{ }\mu\text{M}, 100\text{ }\mu\text{M}$  or  $1\text{ mM}$ ;  $I = 0.10\text{ M}$  (KCl),  $t = 25\text{ }^\circ\text{C}$ ).



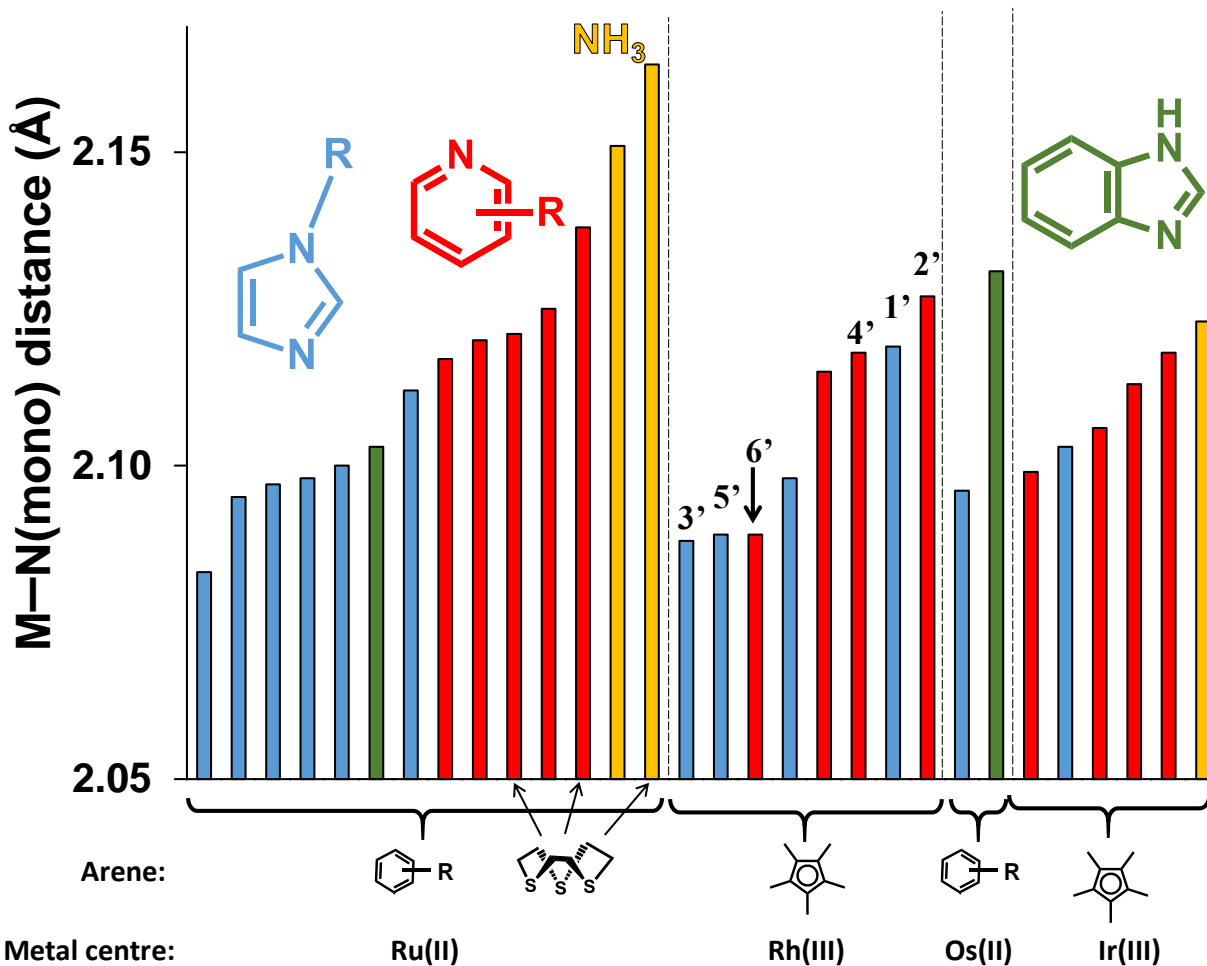

**Figure S27.** Comparison of the M-N(monodentate) distances in different [M(arene)(N,N/O)(N)]-type complexes reported in references [1-12]. Colour code for the monodentate ligand: **blue**: imidazole derivatives; **red**: pyridine derivatives; **green**: benzimidazole; **yellow**: NH<sub>3</sub>. Roman numerals indicate the values derived from complexes 1'-6'.

## TABLES: PROTON DISSOCIATION CONSTANTS AND FORMATION CONSTANTS

**Table S1.** Proton dissociation constants of the coordinated water molecules in  $[M(\text{arene})(N,N/O)(H_2O)]^{2+/+}$  complexes  $\{I = 0.10 \text{ M (KCl)}; t = 25.0 \text{ }^\circ\text{C}\}$ .

| Compound                                            | $pK_a$           | Method | Literature data                 |
|-----------------------------------------------------|------------------|--------|---------------------------------|
| $[\text{RhCp}^*(\text{en})(H_2O)]^{2+}$             | $10.6 \pm 0.1$   | UV-vis | $9.58^1$ [13]<br>$11.05^2$ [13] |
| $[\text{RhCp}^*(8\text{HQBH-1})(H_2O)]^+$           | $10.6 \pm 0.1$   | UV-vis | $10.27^2$ [14]                  |
| $[\text{RhCp}^*(\text{phen})(H_2O)]^{2+}$           | $10.05 \pm 0.01$ | UV-vis | $8.58^2$ [15]                   |
| $[\text{Ru}(p\text{-cym})(\text{en})(H_2O)]^{2+}$   | $9.03 \pm 0.01$  | UV-vis | $8.14^2$ [15]                   |
| $[\text{Ru}(p\text{-cym})(8\text{HQBH-1})(H_2O)]^+$ | $9.31 \pm 0.01$  | UV-vis | $9.19^2$ [14]                   |
| $[\text{Ru}(p\text{-cym})(\text{phen})(H_2O)]^{2+}$ | $8.91 \pm 0.01$  | UV-vis | $7.59^2$ [15]                   |

<sup>1</sup>  $I = 0.20 \text{ M (KNO}_3\text{)}$ ; <sup>2</sup>  $I = 0.20 \text{ M (KCl)}$

**Table S2.** Formation constants ( $\log K$ ) determined for mixed-ligand half-sandwich complexes of Rh(III) and Ru(II) by UV-vis and  $^1\text{H}$  NMR spectroscopy  $\{I = 0.10 \text{ M (KCl)}; t = 25.0 \text{ }^\circ\text{C}\}$ .

| $[M(\text{arene})(N,N/O)(H_2O)]^{2+/+} + N_{\text{mono}} \rightleftharpoons [M(\text{arene})(N,N/O)(N_{\text{mono}})]^{2+/+} + H_2O$ |                    |               |
|--------------------------------------------------------------------------------------------------------------------------------------|--------------------|---------------|
| Aqua complex                                                                                                                         | Monodentate ligand | $\log K$      |
| $[\text{RhCp}^*(\text{en})(H_2O)]^{2+}$                                                                                              | bim                | $3.3 \pm 0.2$ |
| $[\text{RhCp}^*(\text{en})(H_2O)]^{2+}$                                                                                              | mim                | $4.2 \pm 0.1$ |
| $[\text{RhCp}^*(\text{en})(H_2O)]^{2+}$                                                                                              | Py                 | $2.6 \pm 0.1$ |
| $[\text{RhCp}^*(\text{phen})(H_2O)]^{2+}$                                                                                            | bim                | $4.9 \pm 0.2$ |
| $[\text{RhCp}^*(\text{phen})(H_2O)]^{2+}$                                                                                            | mim                | $5.5 \pm 0.1$ |
| $[\text{RhCp}^*(\text{phen})(H_2O)]^{2+}$                                                                                            | Py                 | $4.1 \pm 0.1$ |
| $[\text{RhCp}^*(8\text{HQBH-1})(H_2O)]^+$                                                                                            | bim                | $3.4 \pm 0.1$ |
| $[\text{RhCp}^*(8\text{HQBH-1})(H_2O)]^+$                                                                                            | mim                | $4.7 \pm 0.2$ |
| $[\text{RhCp}^*(8\text{HQBH-1})(H_2O)]^+$                                                                                            | Py                 | $3.0 \pm 0.1$ |
| $[\text{RuCym}(\text{en})(H_2O)]^{2+}$                                                                                               | bim                | $3.5 \pm 0.1$ |
| $[\text{RuCym}(\text{en})(H_2O)]^{2+}$                                                                                               | mim                | $< 2.6$       |
| $[\text{RuCym}(\text{en})(H_2O)]^{2+}$                                                                                               | Py                 | $< 1.5$       |
| $[\text{RuCym}(\text{phen})(H_2O)]^{2+}$                                                                                             | bim                | $5.6 \pm 0.2$ |
| $[\text{RuCym}(\text{phen})(H_2O)]^{2+}$                                                                                             | mim                | $6.7 \pm 0.2$ |
| $[\text{RuCym}(\text{phen})(H_2O)]^{2+}$                                                                                             | Py                 | $4.3 \pm 0.2$ |
| $[\text{RuCym}(8\text{HQBH-1})(H_2O)]^+$                                                                                             | bim                | $2.9 \pm 0.1$ |
| $[\text{RuCym}(8\text{HQBH-1})(H_2O)]^+$                                                                                             | mim                | $< 2.6$       |
| $[\text{RuCym}(8\text{HQBH-1})(H_2O)]^+$                                                                                             | Py                 | $1.6 \pm 0.2$ |

## EXPERIMENTAL DATA TABLES FOR SINGLE-CRYSTAL XRD

**Table S3.** Experimental parameters for the single crystal X-ray diffraction data collection and CCDC-code of the synthesized complexes.

| CCDC-code | Sample    | Machine        | Source | Temp. | Detector Distance | Time/Frame | Frames | Frame width |
|-----------|-----------|----------------|--------|-------|-------------------|------------|--------|-------------|
|           |           |                |        | [K]   | [mm]              | [s]        |        | [°]         |
| 2209815   | <b>6'</b> | Stoe Stadivari | Mo     | 100   | 40                | 10         | 1804   | 0.5         |
| 2209816   | <b>4'</b> | Bruker X8      | Mo     | 100   | 36                | 6          | 1347   | 0.5         |
| 2209817   | <b>2'</b> | Bruker D8      | Mo     | 100   | 34                | 6          | 1805   | 0.5         |
| 2209818   | <b>3'</b> | Bruker X8      | Mo     | 100   | 40                | 8.1        | 5595   | 0.5         |
| 2209819   | <b>1'</b> | Bruker X8      | Mo     | 100   | 35                | 7          | 833    | 0.6         |
| 2209820   | <b>5'</b> | Bruker D8      | Mo     | 100   | 35                | 3          | 1390   | 0.6         |

**Table S4.** Crystal data and structure refinement for complexes **1'-3'**.

|                                                               | <b>1'</b>                                                                                     | <b>2'</b>                                                                                     | <b>3'</b>                                                                        |
|---------------------------------------------------------------|-----------------------------------------------------------------------------------------------|-----------------------------------------------------------------------------------------------|----------------------------------------------------------------------------------|
| Empirical formula                                             | C <sub>18</sub> H <sub>29</sub> F <sub>6</sub> N <sub>4</sub> O <sub>6</sub> RhS <sub>2</sub> | C <sub>19</sub> H <sub>28</sub> F <sub>6</sub> N <sub>3</sub> O <sub>6</sub> RhS <sub>2</sub> | C <sub>76</sub> H <sub>73</sub> B <sub>2</sub> Cl <sub>4</sub> N <sub>4</sub> Rh |
| Formula weight                                                | 678.48                                                                                        | 675.47                                                                                        | 1308.71                                                                          |
| Temperature (K)                                               | 100.0                                                                                         | 100.0                                                                                         | 100.0                                                                            |
| Crystal system, Space group                                   | triclinic                                                                                     | triclinic                                                                                     | triclinic                                                                        |
| Space group                                                   | P-1                                                                                           | P-1                                                                                           | P-1                                                                              |
| Unit cell dimensions                                          |                                                                                               |                                                                                               |                                                                                  |
| a (Å)                                                         | 7.7751(4)                                                                                     | 7.8309(4)                                                                                     | 12.9421(9)                                                                       |
| b (Å)                                                         | 11.5350(7)                                                                                    | 10.8399(5)                                                                                    | 12.9452(9)                                                                       |
| c (Å)                                                         | 15.4437(9)                                                                                    | 15.7969(7)                                                                                    | 20.0369(13)                                                                      |
| $\alpha$ (°)                                                  | 100.4691(17)                                                                                  | 89.5353(16)                                                                                   | 76.964(3)                                                                        |
| $\beta$ (°)                                                   | 91.3163(17)                                                                                   | 85.0745(16)                                                                                   | 85.322(3)                                                                        |
| $\gamma$ (°)                                                  | 103.4897(17)                                                                                  | 79.0821(16)                                                                                   | 86.772(4)                                                                        |
| Volume (Å <sup>3</sup> )                                      | 1321.35(13)                                                                                   | 1311.76(11)                                                                                   | 3255.8(4)                                                                        |
| Z                                                             | 2                                                                                             | 2                                                                                             | 2                                                                                |
| $\rho_{\text{calc}}$ (g/cm <sup>3</sup> )                     | 1.705                                                                                         | 1.710                                                                                         | 1.335                                                                            |
| $\mu$ (mm <sup>-1</sup> )                                     | 0.887                                                                                         | 0.892                                                                                         | 0.474                                                                            |
| F(000)                                                        | 688.0                                                                                         | 684.0                                                                                         | 1360.0                                                                           |
| Crystal size (mm)                                             | 0.13×0.1×0.07                                                                                 | 0.423×0.227×0.08                                                                              | 0.3×0.11×0.08                                                                    |
| Radiation                                                     | Mo-K $\alpha$ ( $\lambda$ =0.71073 Å)                                                         |                                                                                               |                                                                                  |
| 2 $\Theta$ range for data collection (°)                      | 5.378-54.206                                                                                  | 4.602-71.378                                                                                  | 4.432-50.7                                                                       |
| Index ranges                                                  | -9≤h≤9, -14≤k≤14,<br>-19≤l≤19                                                                 | -12≤h≤12, -17≤k≤17,<br>-25≤l≤23                                                               | -15≤h≤15, -15≤k≤15,<br>-23≤l≤24                                                  |
| Reflections collected                                         | 14736                                                                                         | 58577                                                                                         | 97481                                                                            |
| Independent reflections                                       | 5816 [R <sub>int</sub> =0.0269,<br>R <sub>sigma</sub> =0.0308]                                | 12115 [R <sub>int</sub> =0.0303,<br>R <sub>sigma</sub> =0.0271]                               | 11943 [R <sub>int</sub> =0.0804,<br>R <sub>sigma</sub> =0.0482]                  |
| Data / restraints / parameters                                | 5816 / 36 / 364                                                                               | 12115 / 0 / 339                                                                               | 11943 / 0 / 790                                                                  |
| Goodness-of-fit on $F^2$                                      | 1.030                                                                                         | 1.073                                                                                         | 1.089                                                                            |
| Final R indices [ $I > 2\sigma(I)$ ]                          | R <sub>1</sub> =0.0331, wR <sub>2</sub> =0.0788                                               | R <sub>1</sub> =0.0265, wR <sub>2</sub> =0.0571                                               | R <sub>1</sub> =0.0452, wR <sub>2</sub> =0.1179                                  |
| R indices (all data)                                          | R <sub>1</sub> =0.0361, wR <sub>2</sub> =0.0809                                               | R <sub>1</sub> =0.0328, wR <sub>2</sub> =0.0592                                               | R <sub>1</sub> =0.0501, wR <sub>2</sub> =0.1220                                  |
| Largest diff. peak and hole (e <sup>-</sup> Å <sup>-3</sup> ) | 1.64 / -1.04                                                                                  | 0.95 / -1.08                                                                                  | 1.50 / -1.67                                                                     |

**Table S5.** Crystal data and structure refinement for complexes **4'**-**6'**.

|                                                               | <b>4'</b>                                                                                     | <b>5'</b>                                                         | <b>6'</b>                                                       |
|---------------------------------------------------------------|-----------------------------------------------------------------------------------------------|-------------------------------------------------------------------|-----------------------------------------------------------------|
| Empirical formula                                             | C <sub>30</sub> H <sub>32</sub> F <sub>6</sub> N <sub>3</sub> O <sub>7</sub> RhS <sub>2</sub> | C <sub>48</sub> H <sub>51</sub> BN <sub>3</sub> O <sub>2</sub> Rh | C <sub>48</sub> H <sub>46</sub> BN <sub>2</sub> ORh             |
| Formula weight                                                | 827.61                                                                                        | 815.64                                                            | 780.59                                                          |
| Temperature (K)                                               | 100.0                                                                                         | 100.0                                                             | 100.0                                                           |
| Crystal system, Space group                                   | monoclinic                                                                                    | monoclinic                                                        | monoclinic                                                      |
| Space group                                                   | P2 <sub>1</sub> /c                                                                            | P2 <sub>1</sub> /n                                                | P2 <sub>1</sub> /c                                              |
| Unit cell dimensions                                          |                                                                                               |                                                                   |                                                                 |
| a (Å)                                                         | 13.0591(11)                                                                                   | 11.8020(5)                                                        | 29.1880(10)                                                     |
| b (Å)                                                         | 13.5115(9)                                                                                    | 27.8595(9)                                                        | 11.8065(3)                                                      |
| c (Å)                                                         | 18.9926(15)                                                                                   | 12.2552(9)                                                        | 24.8781(10)                                                     |
| $\alpha$ (°)                                                  | 90                                                                                            | 90                                                                | 90                                                              |
| $\beta$ (°)                                                   | 102.252(3)                                                                                    | 90.8912(11)                                                       | 114.956(3)                                                      |
| $\gamma$ (°)                                                  | 90                                                                                            | 90                                                                | 90                                                              |
| Volume (Å <sup>3</sup> )                                      | 3274.9(4)                                                                                     | 4029.0(4)                                                         | 7772.7(5)                                                       |
| Z                                                             | 4                                                                                             | 4                                                                 | 8                                                               |
| $\rho_{\text{calc}}$ (g/cm <sup>3</sup> )                     | 1.679                                                                                         | 1.345                                                             | 1.334                                                           |
| $\mu$ (mm <sup>-1</sup> )                                     | 0.735                                                                                         | 0.467                                                             | 0.478                                                           |
| F(000)                                                        | 1680.0                                                                                        | 1704.0                                                            | 3248.0                                                          |
| Crystal size (mm)                                             | 0.22×0.2×0.03                                                                                 | 0.3×0.07×0.07                                                     | 0.28×0.2×0.06                                                   |
| Radiation                                                     | Mo-K $\alpha$ ( $\lambda$ =0.71073 Å)                                                         |                                                                   |                                                                 |
| 2 $\Theta$ range for data collection (°)                      | 3.728-50.69                                                                                   | 4.524-60.092                                                      | 3.274-51.364                                                    |
| Index ranges                                                  | -14≤h≤15, -15≤k≤16,<br>-22≤l≤22                                                               | -16≤h≤16, -39≤k≤37,<br>-17≤l≤17                                   | -35≤h≤35, -14≤k≤14,<br>-30≤l≤25                                 |
| Reflections collected                                         | 28186                                                                                         | 144915                                                            | 83725                                                           |
| Independent reflections                                       | 5887 [R <sub>int</sub> =0.0506,<br>R <sub>sigma</sub> =0.0447]                                | 11780 [R <sub>int</sub> =0.0628,<br>R <sub>sigma</sub> =0.0249]   | 14760 [R <sub>int</sub> =0.1697,<br>R <sub>sigma</sub> =0.1700] |
| Data / restraints / parameters                                | 5887 / 4 / 469                                                                                | 11780 / 0 / 504                                                   | 14760 / 0 / 966                                                 |
| Goodness-of-fit on F <sup>2</sup>                             | 1.046                                                                                         | 1.074                                                             | 0.953                                                           |
| Final R indices [I>2 $\sigma$ (I)]                            | R <sub>1</sub> =0.0442,<br>wR <sub>2</sub> =0.1065                                            | R <sub>1</sub> =0.0316,<br>wR <sub>2</sub> =0.0641                | R <sub>1</sub> =0.0661,<br>wR <sub>2</sub> =0.1492              |
| R indices (all data)                                          | R <sub>1</sub> =0.0534,<br>wR <sub>2</sub> =0.1133                                            | R <sub>1</sub> =0.0404,<br>wR <sub>2</sub> =0.0697                | R <sub>1</sub> =0.1304,<br>wR <sub>2</sub> =0.1676              |
| Largest diff. peak and hole (e <sup>-</sup> Å <sup>-3</sup> ) | 0.90 / -0.80                                                                                  | 0.67 / -0.75                                                      | 2.26 / -1.31                                                    |

## MIC VALUES FOR ALL COMPOUNDS, pH = 5–8

**Table S6.** Minimal inhibition concentration (MIC) ( $\mu\text{M}$ ) of premixed complexes, bidentate and monodentate ligands on Gram-positive *S. aureus* bacterial strains after one day.

| MIC ( $\mu\text{M}$ )          |                                                        | <i>S. aureus</i> , sensitive |   |      |      | <i>S. aureus</i> , resistant |      |       |       |
|--------------------------------|--------------------------------------------------------|------------------------------|---|------|------|------------------------------|------|-------|-------|
|                                | pH =                                                   | 5                            | 6 | 7    | 8    | 5                            | 6    | 7     | 8     |
| mim                            | Bacterial cell proliferation was inhibited at that pH. |                              |   | >100 | >100 | >100                         | >100 | >100  | >100  |
| Py                             |                                                        |                              |   | >100 | >100 | >100                         | >100 | >100  | >100  |
| econ                           |                                                        |                              |   | 0.78 | 0.19 | 25                           | 12.5 | 6.25  | 3.125 |
| zol                            |                                                        |                              |   | >100 | >100 | >100                         | >100 | >100  | >100  |
| phen                           |                                                        |                              |   | >100 | >100 | 50                           | >100 | >100  | >100  |
| 8HQ                            |                                                        |                              |   | 25   | 25   | 100                          | 6.25 | 6.25  | 6.25  |
| [RhCp*(phen)Cl]Cl              |                                                        |                              |   | >100 | >100 | >100                         | >100 | >100  | >100  |
| +mim                           |                                                        |                              |   | >100 | >100 | >100                         | >100 | >100  | >100  |
| +Py                            |                                                        |                              |   | >100 | >100 | >100                         | >100 | >100  | >100  |
| +econ                          |                                                        |                              |   | 0.78 | 1.56 | 25                           | 12.5 | 3.125 | 3.125 |
| [RhCp*(8HQH <sub>-1</sub> )Cl] |                                                        |                              |   | 12.5 | 12.5 | 50                           | 12.5 | 12.5  | 12.5  |
| +mim                           |                                                        |                              |   | 12.5 | 12.5 | 50                           | 25   | 12.5  | 12.5  |
| +econ                          |                                                        |                              |   | 0.39 | 0.39 | 12.5                         | 6.25 | 3.125 | 3.125 |
| +zol                           |                                                        |                              |   | 12.5 | 25   | 50                           | 50   | 12.5  | 12.5  |

**Table S7.** Minimal inhibition concentration (MIC) ( $\mu\text{M}$ ) of premixed complexes, bidentate and monodentate ligands on Gram-negative *E. coli* bacterial strains after one day.

| MIC ( $\mu\text{M}$ )          |     | <i>E. coli</i> , sensitive |      |      |      | <i>E. coli</i> , resistant |      |      |      |
|--------------------------------|-----|----------------------------|------|------|------|----------------------------|------|------|------|
|                                | pH= | 5                          | 6    | 7    | 8    | 5                          | 6    | 7    | 8    |
| mim                            |     | >100                       | >100 | >100 | >100 | >100                       | >100 | >100 | >100 |
| Py                             |     | >100                       | >100 | >100 | >100 | >100                       | >100 | >100 | >100 |
| econ                           |     | >100                       | >100 | >100 | >100 | >100                       | >100 | >100 | >100 |
| zol                            |     | >100                       | >100 | >100 | >100 | >100                       | >100 | >100 | >100 |
| phen                           |     | 50                         | 50   | 50   | 25   | 50                         | 50   | 50   | 50   |
| 8HQ                            |     | >100                       | >100 | >100 | >100 | >100                       | >100 | >100 | >100 |
| [RhCp*(phen)Cl]Cl              |     | >100                       | >100 | >100 | >100 | >100                       | >100 | >100 | >100 |
| +mim                           |     | >100                       | >100 | >100 | >100 | >100                       | >100 | >100 | >100 |
| +Py                            |     | >100                       | >100 | >100 | >100 | >100                       | >100 | >100 | >100 |
| +econ                          |     | >100                       | >100 | >100 | >100 | >100                       | >100 | >100 | >100 |
| [RhCp*(8HQH <sub>-1</sub> )Cl] |     | >100                       | >100 | >100 | >100 | >100                       | >100 | >100 | >100 |
| +mim                           |     | >100                       | >100 | >100 | >100 | >100                       | >100 | >100 | >100 |
| +econ                          |     | 25                         | 25   | 25   | 25   | 50                         | 100  | 100  | 50   |
| +zol                           |     | >100                       | >100 | >100 | >100 | >100                       | >100 | >100 | >100 |

## REFERENCES

1. Wöckel, S.; Plessow, P.; Schelwies, M.; Brinks, M.K.; Rominger, F.; Hofmann, P.; Limbach, M. Alcohol Amination with Aminoacidato Cp\*Ir(III)-Complexes as Catalysts: Dissociation of the Chelating Ligand during Initiation. *ACS Catal.* **2014**, *4*, 152–161. <https://doi.org/10.1021/cs4009418>
2. Babak, M.V.; Meier, S.M.; Legin, A.A.; Adib Razavi, M.S.; Roller, A.; Jakupec, M.A.; Keppler, B.K.; Hartinger, C.G. Am(m)ines Make the Difference: Organoruthenium Am(m)ine Complexes and Their Chemistry in Anticancer Drug Development. *Chem. Eur. J.* **2013**, *19*, 4308–4318. <https://doi.org/10.1002/chem.201202657>
3. Wang, F.; Habtemariam, A.; van der Geer, E.P.; Fernández, R.; Melchart, M.; Deeth, R.J.; Aird, R.; Guichard, S.; Fabbiani, F.P.; Lozano-Casal, P.; Oswald, I.D.; Jodrell, D.I.; Parsons, S.; Sadler, P.J. Controlling ligand substitution reactions of organometallic complexes: tuning cancer cell cytotoxicity. *Proc. Natl. Acad. Sci. U. S. A.* **2005**, *102*, 18269–18274. <https://doi.org/10.1073/pnas.0505798102>
4. Du, J.; Zhang, E.; Zhao, Y.; Zheng, W.; Zhang, Y.; Lin, Y.; Wang, Z.; Luo, Q.; Wu, K.; Wang, F. Discovery of a dual-targeting organometallic ruthenium complex with high activity inducing early stage apoptosis of cancer cells. *Metallomics* **2015**, *7*, 1573–1583. <https://doi.org/10.1039/C5MT00122F>
5. Zhang, W.-Y.; Bridgewater, H.E.; Banerjee, S.; Soldevila-Barreda, J.J.; Clarkson, G.J.; Shi, H.; Imberti, C.; Sadler, P.J. Ligand-Controlled Reactivity and Cytotoxicity of Cyclometalated Rhodium(III) Complexes. *Eur. J. Inorg. Chem.* **2019**, *2020*, 1052–1060. <https://doi.org/10.1002/ejic.201901055>
6. Betanzos-Lara, S.; Salassa, L.; Habtemariam, A.; Novakova, O.; Pizarro, A.M.; Clarkson, G.J.; Liskova, B.; Brabec, V.; Sadler, P.J. Photoactivatable Organometallic Pyridyl Ruthenium(II) Arene Complexes. *Organometallics* **2012**, *31*, 3466–3479. <https://doi.org/10.1021/om201177y>
7. Battistin, F.; Balducci, G.; Wei, J.; Renfrew, A.K.; Alessio, E. Photolabile Ru Model Complexes with Chelating Diimine Ligands for Light-Triggered Drug Release. *Eur. J. Inorg. Chem.* **2018**, *2018*, 1469–1480. <https://doi.org/10.1002/ejic.201701392>
8. Liu, Z.; Romero-Canelón, I.; Habtemariam, A.; Clarkson, G.J.; Sadler, P.J. Potent Half-Sandwich Iridium(III) Anticancer Complexes Containing C<sub>N</sub>-Chelated and Pyridine Ligands. *Organometallics* **2014**, *33*, 5324–5333. <https://doi.org/10.1021/om500644f>
9. Martinez, A.; Carreon, T.; Iniguez, E.; Anzellotti, A.; Sanchez, A.; Tyan, M.; Sattler, A.; Herrera, L.; Maldonado, R.A.; Sanchez-Delgado, R.A. Searching for New Chemotherapies for Tropical Diseases: Ruthenium–Clotrimazole Complexes Display High in Vitro Activity against *Leishmania major* and *Trypanosoma cruzi* and Low Toxicity toward Normal Mammalian Cells. *J. Med. Chem.* **2012**, *55*, 3867–3877. <https://doi.org/10.1021/jm300070h>
10. Liu, Z.; Romero-Canelón, I.; Qamar, B.; Hearn, J.M.; Habtemariam, A.; Barry, N.P.E.; Pizarro, A.M.; Clarkson, G.J.; Sadler, P.J. The Potent Oxidant Anticancer Activity of Organoiridium Catalysts. *Angew. Chem., Int. Ed.* **2014**, *53*, 3941–3946. <https://doi.org/10.1002/anie.201311161>
11. Hackl, C.M.; Legina, M.S.; Pichler, V.; Schmidlehner, M.; Roller, A.; Dömötör, O.; Enyedy, É.A.; Jakupec, M.A.; Kandioller, W.; Keppler, B.K. Thiomaltol-Based Organometallic Complexes with 1-Methylimidazole as Leaving Group: Synthesis, Stability, and Biological Behavior. *Chem. Eur. J.* **2016**, *22*, 17269–17281. <https://doi.org/10.1002/chem.201603206>
12. Schuecker, R.; John, R.O.; Jakupec, M.A.; Arion, V.B.; Keppler, B.K. Water-Soluble Mixed-Ligand Ruthenium(II) and Osmium(II) Arene Complexes with High Antiproliferative Activity. *Organometallics* **2008**, *27*, 6587–6595. <https://doi.org/10.1021/om800774t>
13. Enyedy, É.A.; Mészáros, J.P.; Dömötör, O.; Hackl, C.M.; Roller, A.; Keppler, B.K.; Kandioller, W. Comparative solution equilibrium studies on pentamethylcyclopentadienyl rhodium complexes of 2,2'-bipyridine and ethylenediamine and their interaction with human serum albumin. *J. Inorg. Biochem.* **2015**, *152*, 93–103. <https://doi.org/10.1016/j.jinorgbio.2015.08.025>
14. Dömötör, O.; Pape, V.F.S.; May, N.V.; Szakács, G.; Enyedy, É.A. Comparative solution equilibrium studies of antitumor ruthenium( $\eta^6$ -*p*-cymene) and rhodium ( $\eta^5$ -C<sub>5</sub>Me<sub>5</sub>) complexes of 8-hydroxyquinolines. *Dalton Trans.* **2017**, *46*, 4382–4392. <https://doi.org/10.1039/C7DT00439G>
15. Mészáros, J.P.; Pape, V.F.S.; Szakács, G.; Németi, G.; Dénes, M.; Holczbauer, T.; May, N.V.; Enyedy, É.A. Half-sandwich organometallic Ru and Rh complexes of (N,N) donor compounds: Effect of ligand methylation on solution speciation and anticancer activity. *Dalton Trans.* **2021**, *50*, 8218–8231. <https://doi.org/10.1039/D1DT00808K>
